# Supplementary material for: Mapping and Assessment of Ecosystems Services under the Proposed MAES European Common Framework: Methodological Challenges and Opportunities
Source: MDPI journal article supplement (doi:10.3390/land10101040), 2021-10-02
Supplement: s1 [file s1]

# SUPPLEMENTARY MATERIAL

## S1 LULC CLASSES – AGREGATION CRITERIA

| LULC Classes (5 Levels) |                                                |                                                                  |                                                          |                                                            | LULC Aggregation for Regression Models |
|-------------------------|------------------------------------------------|------------------------------------------------------------------|----------------------------------------------------------|------------------------------------------------------------|----------------------------------------|
| Level 1                 | Level 2                                        | Level 3                                                          | Level 4                                                  | Level 5                                                    |                                        |
| 1 Artificial areas      | 1.1 Urban fabric                               | 1.1.1 Continuous urban fabric                                    | 1.1.1.1 Continuous urban fabric predominantly vertical   | 1.1.1.1.1 Continuous urban fabric predominantly vertical   | NO DATA                                |
|                         |                                                |                                                                  | 1.1.1.2 Continuous urban fabric predominantly horizontal | 1.1.1.2.1 Continuous urban fabric predominantly horizontal |                                        |
|                         |                                                |                                                                  | 1.1.1.3 Parking lots and yards                           | 1.1.1.3.1 Parking lots and yards                           |                                        |
|                         |                                                | 1.1.2 Discontinuous urban fabric                                 | 1.1.2.1 Discontinuous urban fabric                       | 1.1.2.1.1 Discontinuous urban fabric                       |                                        |
|                         |                                                |                                                                  | 1.1.2.2 Sparse discontinuous urban fabric                | 1.1.2.2.1 Sparse discontinuous urban fabric                |                                        |
|                         |                                                |                                                                  |                                                          |                                                            |                                        |
|                         | 1.2 Industrial, commercial and transport units | 1.2.1 Industrial and commercial units and general infrastructure | 1.2.1.1 Industrial units                                 | 1.2.1.1.1 Industrial units                                 |                                        |
|                         |                                                |                                                                  | 1.2.1.2 Commercial units                                 | 1.2.1.2.1 Commercial units                                 |                                        |
|                         |                                                |                                                                  | 1.2.1.3 Agricultural facilities                          | 1.2.1.3.1 Agricultural facilities                          |                                        |
|                         |                                                |                                                                  | 1.2.1.4 Public and private facilities                    | 1.2.1.4.1 Public and private facilities                    |                                        |
|                         |                                                |                                                                  | 1.2.1.5 Energy production infrastructure                 | 1.2.1.5.1 Renewable energy production infrastructure       |                                        |
|                         |                                                |                                                                  |                                                          | 1.2.1.5.2 Non-renewable energy production infrastructure   |                                        |
|                         |                                                |                                                                  | 1.2.1.6 Water supply infrastructure                      | 1.2.1.6.1 Water supply infrastructure                      |                                        |
|                         |                                                |                                                                  | 1.2.1.7 Waste and wastewater treatment infrastructure    | 1.2.1.7.1 Waste and wastewater treatment infrastructure    |                                        |
|                         |                                                | 1.2.2 Road and rail network and associated land                  | 1.2.2.1 Road network and associated land                 | 1.2.2.1.1 Road network and associated land                 |                                        |
|                         |                                                |                                                                  | 1.2.2.2 Rail network and associated land                 | 1.2.2.2.1 Rail network and associated land                 |                                        |
|                         |                                                | 1.2.3 Port areas                                                 | 1.2.3.1 Sea and river docks                              | 1.2.3.1.1 Sea and river ports                              |                                        |
|                         |                                                |                                                                  | 1.2.3.2 Ship building and repairment areas               | 1.2.3.2.1 Ship construction and repairment docks           |                                        |
|                         |                                                |                                                                  | 1.2.3.3 Marinas and fishing ports                        | 1.2.3.3.1 Marinas and fishing harbors                      |                                        |
|                         |                                                | 1.2.4 Airports                                                   | 1.2.4.1 Airports                                         | 1.2.4.1.1 Airports                                         |                                        |
|                         |                                                |                                                                  | 1.2.4.2 Airfields                                        | 1.2.4.2.1 Airfields                                        |                                        |
|                         | 1.3 Mineral extraction, waste                  | 1.3.1 Mineral extraction sites                                   | 1.3.1.1 Surface mines                                    | 1.3.1.1.1 Surface mines                                    |                                        |
|                         |                                                |                                                                  | 1.3.1.2 Quarries                                         | 1.3.1.2.1 Quarries                                         |                                        |
|                         |                                                | 1.3.2 Waste                                                      | 1.3.2.1 Landfills                                        | 1.3.2.1.1 Landfills                                        |                                        |

| LULC Classes (5 Levels) |                                                                                    |                                                                   |                                                |                                                  | LULC Aggregation for Regression Models |
|-------------------------|------------------------------------------------------------------------------------|-------------------------------------------------------------------|------------------------------------------------|--------------------------------------------------|----------------------------------------|
| Level 1                 | Level 2                                                                            | Level 3                                                           | Level 4                                        | Level 5                                          |                                        |
|                         | disposal and construction sites                                                    | disposal areas                                                    | 1.3.2.2 Dumps and scrap yards                  | 1.3.2.2.1 Dumps and scrap yards                  |                                        |
|                         |                                                                                    | 1.3.3 Construction sites                                          | 1.3.3.1 Construction sites                     | 1.3.3.1.1 Construction sites                     |                                        |
|                         |                                                                                    |                                                                   | 1.3.3.2 Abandoned sites in artificial areas    | 1.3.3.2.1 Abandoned sites in artificial areas    |                                        |
|                         | 1.4 Green urban areas, sports, leisure and cultural facilities, and historic zones | 1.4.1 Green urban areas                                           | 1.4.1.1 Parks and gardens                      | 1.4.1.1.1 Parks and gardens                      |                                        |
|                         |                                                                                    |                                                                   | 1.4.1.2 Cemeteries                             | 1.4.1.2.1 Cemeteries                             |                                        |
|                         |                                                                                    | 1.4.2 Sports, leisure and cultural facilities, and historic zones | 1.4.2.1 Sports facilities                      | 1.4.2.1.1 Golf courses                           |                                        |
|                         |                                                                                    |                                                                   | 1.4.2.2 Leisure facilities                     | 1.4.2.1.2 Other sports facilities                |                                        |
|                         |                                                                                    |                                                                   |                                                | 1.4.2.2.1 Campsites                              |                                        |
|                         |                                                                                    |                                                                   |                                                | 1.4.2.2.2 Other leisure facilities               |                                        |
|                         |                                                                                    |                                                                   | 1.4.2.3 Cultural facilities and historic zones | 1.4.2.3.1 Cultural facilities and historic zones |                                        |
| 2                       | Agricultural and agro-forestry areas                                               | 2.1 Arable land                                                   | 2.1.1 Non-irrigated arable land                | 2.1.1.1 Non-irrigated arable land                | A                                      |
|                         |                                                                                    |                                                                   | 2.1.1.2 Greenhouses and nurseries              | 2.1.1.2.1 Greenhouses and nurseries              |                                        |
|                         |                                                                                    | 2.1.2 Irrigated arable land                                       | 2.1.2.1 Irrigated arable land                  | 2.1.2.1.1 Irrigated arable land                  |                                        |
|                         |                                                                                    | 2.1.3 Rice fields                                                 | 2.1.3.1 Rice fields                            | 2.1.3.1.1 Rice fields                            |                                        |
|                         | 2.2 Permanent crops                                                                | 2.2.1 Vineyards                                                   | 2.2.1.1 Vineyards                              | 2.2.1.1.1 Vineyards                              | AF                                     |
|                         |                                                                                    |                                                                   | 2.2.1.2 Vineyards with orchards                | 2.2.1.2.1 Vineyards with orchards                |                                        |
|                         |                                                                                    |                                                                   | 2.2.1.3 Vineyards with olive groves            | 2.2.1.3.1 Vineyards with olive groves            |                                        |
|                         |                                                                                    | 2.2.2 Orchards                                                    | 2.2.2.1 Orchards                               | 2.2.2.1.1 Fresh fruit orchards                   |                                        |
|                         |                                                                                    |                                                                   |                                                | 2.2.2.1.2 Almond orchards                        |                                        |
|                         |                                                                                    |                                                                   |                                                | 2.2.2.1.3 Sweet chestnut orchards                |                                        |
|                         |                                                                                    |                                                                   |                                                | 2.2.2.1.4 Carob orchards                         |                                        |
|                         |                                                                                    |                                                                   |                                                | 2.2.2.1.5 Citrus orchards                        |                                        |
|                         |                                                                                    |                                                                   |                                                | 2.2.2.1.6 Other orchards                         |                                        |
|                         |                                                                                    | 2.2.2 Orchards                                                    | 2.2.2.2 Orchards with vineyards                | 2.2.2.2.1 Fresh fruit orchards with vineyards    |                                        |
|                         |                                                                                    |                                                                   |                                                | 2.2.2.2.2 Almond orchards with vineyards         |                                        |
|                         |                                                                                    |                                                                   |                                                | 2.2.2.2.3 Sweet chestnut orchards with vineyards |                                        |
|                         |                                                                                    |                                                                   |                                                | 2.2.2.2.4 Carob orchards with vineyards          |                                        |

| LULC Classes (5 Levels) |                                                            |                                                                   |                                                                   |                                                                  | LULC Aggregation for Regression Models |    |
|-------------------------|------------------------------------------------------------|-------------------------------------------------------------------|-------------------------------------------------------------------|------------------------------------------------------------------|----------------------------------------|----|
| Level 1                 | Level 2                                                    | Level 3                                                           | Level 4                                                           | Level 5                                                          |                                        |    |
|                         |                                                            |                                                                   |                                                                   | 2.2.2.2.5 Citrus orchards with vineyards                         |                                        |    |
|                         |                                                            |                                                                   |                                                                   | 2.2.2.2.6 Other orchards with vineyards                          |                                        |    |
|                         |                                                            |                                                                   |                                                                   | 2.2.2.3.1 Fresh fruit orchards with olive groves                 |                                        |    |
|                         |                                                            |                                                                   |                                                                   | 2.2.2.3.2 Almond orchards with olive groves                      |                                        |    |
|                         |                                                            |                                                                   |                                                                   | 2.2.2.3.3 Sweet chestnut orchards with olive groves              |                                        |    |
|                         |                                                            |                                                                   |                                                                   | 2.2.2.3.4 Carob orchards with olive groves                       |                                        |    |
|                         |                                                            |                                                                   |                                                                   | 2.2.2.3.5 Citrus orchards with olive groves                      |                                        |    |
|                         |                                                            |                                                                   |                                                                   | 2.2.2.3.6 Other orchards with olive groves                       |                                        |    |
|                         |                                                            | 2.2.3 Olive groves                                                | 2.2.3.1 Olive groves                                              | 2.2.3.1.1 Olive groves                                           |                                        |    |
|                         |                                                            |                                                                   | 2.2.3.2 Olive groves with vineyards                               | 2.2.3.2.1 Olive groves with vineyards                            |                                        |    |
|                         |                                                            |                                                                   | 2.2.3.3 Olive groves with orchards                                | 2.2.3.3.1 Olive groves with orchards                             |                                        |    |
|                         | 2.3 Permanent pastures                                     | 2.3.1 Permanent pastures                                          | 2.3.1.1 Permanent pastures                                        | 2.3.1.1.1 Permanent pastures                                     | A                                      |    |
|                         | 2.4 Heterogeneous agricultural areas                       | 2.4.1 Arable land and/or pastures associated with permanent crops | 2.4.1.1 Non-irrigated arable land associated with permanent crops | 2.4.1.1.1 Non-irrigated arable land associated with vineyards    |                                        |    |
|                         |                                                            |                                                                   |                                                                   | 2.4.1.1.2 Non-irrigated arable land associated with orchards     |                                        |    |
|                         |                                                            |                                                                   |                                                                   | 2.4.1.1.3 Non-irrigated arable land associated with olive groves |                                        |    |
|                         |                                                            |                                                                   | 2.4.1.2 Irrigated arable land associated with permanent crops     | 2.4.1.2.1 Irrigated arable land associated with vineyards        |                                        |    |
|                         |                                                            |                                                                   |                                                                   | 2.4.1.2.2 Irrigated arable land associated with orchards         |                                        |    |
|                         |                                                            |                                                                   |                                                                   | 2.4.1.2.3 Irrigated arable land associated with olive groves     |                                        |    |
|                         |                                                            |                                                                   | 2.4.1.3 Pastures associated with permanent crops                  | 2.4.1.3.1 Pastures associated with vineyards                     |                                        | AF |
|                         |                                                            |                                                                   |                                                                   | 2.4.1.3.2 Pastures associated with orchards                      |                                        |    |
|                         |                                                            |                                                                   |                                                                   | 2.4.1.3.3 Pastures associated with olive groves                  |                                        |    |
|                         | 2.4.2 Complex cultivation patterns                         | 2.4.2.1 Complex cultivation patterns                              | 2.4.2.1.1 Complex cultivation patterns                            |                                                                  |                                        |    |
|                         | 2.4.3 Agriculture with natural and semi-natural vegetation | 2.4.3.1 Agriculture with natural and semi-natural vegetation      | 2.4.3.1.1 Agriculture with natural and semi-natural vegetation    |                                                                  |                                        |    |
|                         | 2.4.4 Agro-forestry systems (AFS)                          | 2.4.4.1 AFS with non-irrigated arable land                        | 2.4.4.1.1 AFS of cork oak with non-irrigated arable land          | AF                                                               |                                        |    |
|                         |                                                            |                                                                   | 2.4.4.1.2 AFS of holm oak with non-irrigated arable land          |                                                                  |                                        |    |

| LULC Classes (5 Levels) |                               |                            |                                          |                                                                    | LULC Aggregation for Regression Models |
|-------------------------|-------------------------------|----------------------------|------------------------------------------|--------------------------------------------------------------------|----------------------------------------|
| Level 1                 | Level 2                       | Level 3                    | Level 4                                  | Level 5                                                            |                                        |
|                         |                               |                            |                                          | 2.4.4.1.3 AFS of other oaks with non-irrigated arable land         |                                        |
|                         |                               |                            |                                          | 2.4.4.1.4 AFS of other species with non-irrigated arable land      |                                        |
|                         |                               |                            |                                          | 2.4.4.1.5 AFS of cork and holm oaks with non-irrigated arable land |                                        |
|                         |                               |                            |                                          | 2.4.4.1.6 AFS of other mixtures with non-irrigated arable land     |                                        |
|                         |                               |                            |                                          | 2.4.4.2.1 AFS of cork oak with irrigated arable land               |                                        |
|                         |                               |                            |                                          | 2.4.4.2.2 AFS of holm oak with irrigated arable land               |                                        |
|                         |                               |                            |                                          | 2.4.4.2.3 AFS of other oaks with irrigated arable land             |                                        |
|                         |                               |                            |                                          | 2.4.4.2.4 AFS of other species with irrigated arable land          |                                        |
|                         |                               |                            |                                          | 2.4.4.2.5 AFS of cork and holm oaks with irrigated arable land     |                                        |
|                         |                               |                            |                                          | 2.4.4.2.6 AFS of other mixtures with irrigated arable land         |                                        |
|                         |                               |                            |                                          | 2.4.4.3.1 AFS of cork oak with pastures                            |                                        |
|                         |                               |                            |                                          | 2.4.4.3.2 AFS of holm oak with pastures                            |                                        |
|                         |                               |                            |                                          | 2.4.4.3.3 AFS of other oaks with pastures                          |                                        |
|                         |                               |                            |                                          | 2.4.4.3.4 AFS of other species with pastures                       |                                        |
|                         |                               |                            |                                          | 2.4.4.3.5 AFS of cork and holm oaks with pastures                  |                                        |
|                         |                               |                            |                                          | 2.4.4.3.6 AFS of other mixtures with pastures                      |                                        |
|                         |                               |                            |                                          | 2.4.4.4.1 AFS of cork oak with permanent crops                     |                                        |
|                         |                               |                            |                                          | 2.4.4.4.2 AFS of holm oak with permanent crops                     |                                        |
|                         |                               |                            |                                          | 2.4.4.4.3 AFS of other oaks with permanent crops                   |                                        |
|                         |                               |                            |                                          | 2.4.4.4.4 AFS of other species with permanent crops                |                                        |
|                         |                               |                            |                                          | 2.4.4.4.5 AFS of cork and holm oaks with permanent crops           |                                        |
|                         |                               |                            |                                          | 2.4.4.4.6 AFS of other mixtures with permanent crops               |                                        |
| 3                       | Forests and natural and semi- | 3.1.1 Broad-leaved forests | 3.1.1.1 Pure broad-leaved forests        | 3.1.1.1.1 Cork oak forests                                         |                                        |
|                         |                               |                            |                                          | 3.1.1.1.2 Holm oak forests                                         |                                        |
|                         |                               |                            |                                          | 3.1.1.1.3 Forests of other oaks                                    |                                        |
|                         |                               |                            |                                          | 3.1.1.1.4 Sweet chestnut forests                                   |                                        |
|                         |                               |                            |                                          | 3.1.1.1.5 Eucalyptus forests                                       |                                        |
|                         |                               |                            |                                          | 3.1.1.1.6 Forests of invasive species                              |                                        |
|                         |                               |                            |                                          | 3.1.1.1.7 Forests of other broad-leaved species                    |                                        |
|                         |                               |                            | 3.1.1.2 Forests of broad-leaved mixtures | 3.1.1.2.1 Forests of cork oak with broad-leaved trees              |                                        |
|                         |                               |                            |                                          | 3.1.1.2.2 Forests of holm oak with broad-leaved trees              |                                        |
|                         |                               |                            |                                          | 3.1.1.2.3 Forests of other oaks with broad-leaved trees            |                                        |

| LULC Classes (5 Levels) |                                                    |                                     |                                                                     |                                                                         | LULC Aggregation for Regression Models |
|-------------------------|----------------------------------------------------|-------------------------------------|---------------------------------------------------------------------|-------------------------------------------------------------------------|----------------------------------------|
| Level 1                 | Level 2                                            | Level 3                             | Level 4                                                             | Level 5                                                                 |                                        |
| natural areas           | 3.1 Forests                                        |                                     |                                                                     | 3.1.1.2.4 Forests of sweet chestnut with broad-leaved trees             |                                        |
|                         |                                                    |                                     |                                                                     | 3.1.1.2.5 Forests of eucalyptus with broad-leaved trees                 |                                        |
|                         |                                                    |                                     |                                                                     | 3.1.1.2.6 Forests of invasive species with broad-leaved trees           |                                        |
|                         |                                                    |                                     |                                                                     | 3.1.1.2.7 Forests of other broad-leaved species with broad-leaved trees |                                        |
|                         |                                                    | 3.1.2 Coniferous forests            | 3.1.2.1 Pure coniferous forests                                     | 3.1.2.1.1 Maritime pine forests                                         |                                        |
|                         |                                                    |                                     |                                                                     | 3.1.2.1.2 Stone pine forests                                            |                                        |
|                         |                                                    |                                     |                                                                     | 3.1.2.1.3 Forests of other coniferous species                           |                                        |
|                         |                                                    |                                     | 3.1.2.2 Forests of coniferous mixtures                              | 3.1.2.2.1 Forests of maritime pine with coniferous trees                |                                        |
|                         |                                                    |                                     |                                                                     | 3.1.2.2.2 Forests of stone pine with coniferous trees                   |                                        |
|                         |                                                    |                                     |                                                                     | 3.1.2.2.3 Forests of other coniferous species with coniferous trees     |                                        |
|                         |                                                    | 3.1.3 Mixed forests                 | 3.1.3.1 Mixed forests of broad-leaved species with coniferous trees | 3.1.3.1.1 Forests of cork oak with coniferous trees                     |                                        |
|                         |                                                    |                                     |                                                                     | 3.1.3.1.2 Forests of holm oak with coniferous trees                     |                                        |
|                         |                                                    |                                     |                                                                     | 3.1.3.1.3 Forests of other oaks with coniferous trees                   |                                        |
|                         |                                                    |                                     |                                                                     | 3.1.3.1.4 Forests of sweet chestnut with coniferous trees               |                                        |
|                         |                                                    |                                     |                                                                     | 3.1.3.1.5 Forests of eucalyptus with coniferous trees                   |                                        |
|                         |                                                    |                                     |                                                                     | 3.1.3.1.6 Forests of invasive species with coniferous trees             |                                        |
|                         |                                                    |                                     |                                                                     | 3.1.3.1.7 Forests of other broad-leaved species with coniferous trees   |                                        |
|                         |                                                    |                                     |                                                                     | 3.1.3.1.8 Forests of broad-leaved mixtures with coniferous trees        |                                        |
|                         |                                                    |                                     | 3.1.3.2 Mixed forests of coniferous species with broad-leaved trees | 3.1.3.2.1 Forests of maritime pine with broad-leaved trees              |                                        |
|                         |                                                    |                                     |                                                                     | 3.1.3.2.2 Forests of stone pine with broad-leaved trees                 |                                        |
|                         |                                                    |                                     |                                                                     | 3.1.3.2.3 Forests of other coniferous species with broad-leaved trees   |                                        |
|                         |                                                    |                                     |                                                                     | 3.1.3.2.4 Forests of coniferous mixtures with broad-leaved trees        |                                        |
|                         |                                                    |                                     |                                                                     |                                                                         |                                        |
|                         |                                                    |                                     |                                                                     |                                                                         |                                        |
|                         | 3.2 Open forests, shrubs and herbaceous vegetation | 3.2.1 Natural herbaceous vegetation | 3.2.1.1 Natural herbaceous vegetation                               | 3.2.1.1.1 Natural herbaceous vegetation                                 | A                                      |
|                         |                                                    |                                     |                                                                     |                                                                         |                                        |
|                         |                                                    | 3.2.2 Shrublands                    | 3.2.2.1 Closed shrublands                                           | 3.2.2.1.1 Closed shrublands                                             |                                        |
|                         |                                                    |                                     | 3.2.2.2 Open shrublands                                             | 3.2.2.2.1 Open shrublands                                               |                                        |
|                         |                                                    | 3.2.3 Sclerophyllous vegetation     | 3.2.3.1 Closed sclerophyllous vegetation                            | 3.2.3.1.1 Closed sclerophyllous vegetation                              |                                        |
|                         |                                                    |                                     | 3.2.3.2 Open sclerophyllous vegetation                              | 3.2.3.2.1 Open sclerophyllous vegetation                                |                                        |
|                         |                                                    |                                     |                                                                     | 3.2.4.1.1 Cork oak open forests                                         | F                                      |
|                         |                                                    |                                     |                                                                     |                                                                         |                                        |

| LULC Classes (5 Levels) |         |                                                     |                                                                          |                                                                              | LULC Aggregation for Regression Models |
|-------------------------|---------|-----------------------------------------------------|--------------------------------------------------------------------------|------------------------------------------------------------------------------|----------------------------------------|
| Level 1                 | Level 2 | Level 3                                             | Level 4                                                                  | Level 5                                                                      |                                        |
|                         |         | 3.2.4 Open forests, clearcuts and young plantations | 3.2.4.1 Pure broad-leaved open forests                                   | 3.2.4.1.2 Holm oak open forests                                              |                                        |
|                         |         |                                                     |                                                                          | 3.2.4.1.3 Open forests of other oaks                                         |                                        |
|                         |         |                                                     |                                                                          | 3.2.4.1.4 Sweet chestnut open forests                                        |                                        |
|                         |         |                                                     |                                                                          | 3.2.4.1.5 Eucalyptus open forests                                            |                                        |
|                         |         |                                                     |                                                                          | 3.2.4.1.6 Open forests of invasive species                                   |                                        |
|                         |         |                                                     |                                                                          | 3.2.4.1.7 Open forests of other broad-leaved species                         |                                        |
|                         |         |                                                     | 3.2.4.2 Open forests of broad-leaved mixtures                            | 3.2.4.2.1 Open forests of cork oak with broad-leaved trees                   |                                        |
|                         |         |                                                     |                                                                          | 3.2.4.2.2 Open forests of holm oak with broad-leaved trees                   |                                        |
|                         |         |                                                     |                                                                          | 3.2.4.2.3 Open forests of other oaks with broad-leaved trees                 |                                        |
|                         |         |                                                     |                                                                          | 3.2.4.2.4 Open forests of sweet chestnut with broad-leaved trees             |                                        |
|                         |         |                                                     |                                                                          | 3.2.4.2.5 Open forests of eucalyptus with broad-leaved trees                 |                                        |
|                         |         |                                                     |                                                                          | 3.2.4.2.6 Open forests of invasive species with broad-leaved trees           |                                        |
|                         |         |                                                     |                                                                          | 3.2.4.2.7 Open forests of other broad-leaved species with broad-leaved trees |                                        |
|                         |         |                                                     | 3.2.4.3 Pure coniferous open forests                                     | 3.2.4.3.1 Maritime pine open forests                                         |                                        |
|                         |         |                                                     |                                                                          | 3.2.4.3.2 Stone pine open forests                                            |                                        |
|                         |         |                                                     |                                                                          | 3.2.4.3.3 Open forests of other coniferous species                           |                                        |
|                         |         |                                                     | 3.2.4.4 Open forests of coniferous mixtures                              | 3.2.4.4.1 Open forests of maritime pine with coniferous trees                |                                        |
|                         |         |                                                     |                                                                          | 3.2.4.4.2 Open forests of stone pine with coniferous trees                   |                                        |
|                         |         |                                                     |                                                                          | 3.2.4.4.3 Open forests of other coniferous species with coniferous trees     |                                        |
|                         |         |                                                     | 3.2.4.5 Mixed open forests of broad-leaved species with coniferous trees | 3.2.4.5.1 Open forests of cork oak with coniferous trees                     |                                        |
|                         |         |                                                     |                                                                          | 3.2.4.5.2 Open forests of holm oak with coniferous trees                     |                                        |
|                         |         |                                                     |                                                                          | 3.2.4.5.3 Open forests of other oaks with coniferous trees                   |                                        |
|                         |         |                                                     |                                                                          | 3.2.4.5.4 Open forests of sweet chestnut with coniferous trees               |                                        |
|                         |         |                                                     |                                                                          | 3.2.4.5.5 Open forests of eucalyptus with coniferous trees                   |                                        |
|                         |         |                                                     |                                                                          | 3.2.4.5.6 Open forests of invasive species with coniferous trees             |                                        |
|                         |         |                                                     |                                                                          | 3.2.4.5.7 Open forests of other broad-leaved species with coniferous trees   |                                        |
|                         |         |                                                     |                                                                          | 3.2.4.5.8 Open forests of broad-leaved mixtures with coniferous trees        | F                                      |
|                         |         |                                                     | 3.2.4.6 Mixed open forests of coniferous species                         | 3.2.4.6.1 Open forests of maritime pine with broad-leaved trees              |                                        |
|                         |         |                                                     |                                                                          | 3.2.4.6.2 Open forests of stone pine with broad-leaved trees                 |                                        |

| LULC Classes (5 Levels) |                                              |                                      |                                                |                                                                            | LULC Aggregation for Regression Models |
|-------------------------|----------------------------------------------|--------------------------------------|------------------------------------------------|----------------------------------------------------------------------------|----------------------------------------|
| Level 1                 | Level 2                                      | Level 3                              | Level 4                                        | Level 5                                                                    |                                        |
|                         |                                              |                                      | with broad-leaved trees                        | 3.2.4.6.3 Open forests of other coniferous species with broad-leaved trees |                                        |
|                         |                                              |                                      |                                                | 3.2.4.6.4 Open forests of coniferous mixtures with broad-leaved trees      |                                        |
|                         |                                              |                                      | 3.2.4.7 Other woody vegetation                 | 3.2.4.7.1 Other woody vegetation                                           |                                        |
|                         |                                              |                                      | 3.2.4.8 Clearcuts and young plantations        | 3.2.4.8.1 Clearcuts                                                        |                                        |
|                         |                                              |                                      |                                                | 3.2.4.8.2 Young plantations                                                |                                        |
|                         |                                              |                                      | 3.2.4.9 Forest nurseries                       | 3.2.4.9.1 Forest nurseries                                                 |                                        |
|                         |                                              |                                      | 3.2.4.10 Firebreaks                            | 3.2.4.10.1 Firebreaks                                                      |                                        |
|                         | 3.3 Open spaces with little or no vegetation | 3.3.1 Beaches, dunes and sand plains | 3.3.1.1 Inland beaches, dunes and sand plains  | 3.3.1.1.1 Inland beaches, dunes and sand plains                            | NO DATA                                |
|                         |                                              |                                      | 3.3.1.2 Coastal beaches, dunes and sand plains | 3.3.1.2.1 Coastal beaches, dunes and sand plains                           |                                        |
|                         |                                              | 3.3.2 Bare rock                      | 3.3.2.1 Bare rock                              | 3.3.2.1.1 Bare rock                                                        |                                        |
|                         |                                              | 3.3.3 Sparsely vegetated areas       | 3.3.3.1 Sparsely vegetated areas               | 3.3.3.1.1 Sparsely vegetated areas                                         |                                        |
|                         |                                              | 3.3.4 Burnt areas                    | 3.3.4.1 Burnt areas                            | 3.3.4.1.1 Burnt areas                                                      |                                        |
| 4                       | 4.1 Inland wetlands                          | 4.1.1 Inland marshes                 | 4.1.1.1 Inland marshes                         | 4.1.1.1.1 Inland marshes                                                   |                                        |
|                         |                                              | 4.1.2 Peat bogs                      | 4.1.2.1 Peat bogs                              | 4.1.2.1.1 Peat bogs                                                        |                                        |
|                         | 4.2 Coastal wetlands                         | 4.2.1 Salt marshes                   | 4.2.1.1 Salt marshes                           | 4.2.1.1.1 Salt marshes                                                     |                                        |
|                         |                                              | 4.2.2 Saline and coastal aquaculture | 4.2.2.1 Saline                                 | 4.2.2.1.1 Saline                                                           |                                        |
|                         |                                              |                                      | 4.2.2.2 Coastal aquaculture                    | 4.2.2.2.1 Coastal aquaculture                                              |                                        |
|                         |                                              | 4.2.3 Intertidal flats               | 4.2.3.1 Intertidal flats                       | 4.2.3.1.1 Intertidal flats                                                 |                                        |
| 5 Water bodies          | 5.1 Inland waters                            | 5.1.1 Water courses                  | 5.1.1.1 Natural water courses                  | 5.1.1.1.1 Natural water courses                                            |                                        |
|                         |                                              |                                      | 5.1.1.2 Artificial water channels              | 5.1.1.2.1 Artificial water channels                                        |                                        |
|                         |                                              | 5.1.2 Water bodies                   | 5.1.2.1 Inland lakes and lagoons               | 5.1.2.1.1 Artificial inland lakes and lagoons                              |                                        |
|                         |                                              |                                      |                                                | 5.1.2.1.2 Natural inland lakes and lagoons                                 |                                        |
|                         |                                              |                                      | 5.1.2.2 Barrage reservoirs                     | 5.1.2.2.1 Barrage reservoirs                                               |                                        |
|                         |                                              |                                      |                                                | 5.1.2.3.1 Small dam reservoirs                                             |                                        |
|                         |                                              |                                      | 5.1.2.3 Other artificial water bodies          | 5.1.2.3.2 Artificial ponds                                                 |                                        |
|                         |                                              |                                      |                                                | 5.1.2.3.3 Inland aquaculture                                               |                                        |
|                         | 5.2 Marine and coastal waters                | 5.2.1 Coastal lagoons                | 5.2.1.1 Coastal lagoons                        | 5.2.1.1.1 Coastal lagoons                                                  |                                        |
|                         |                                              | 5.2.2 Rivers mouths                  | 5.2.2.1 Rivers mouths                          | 5.2.2.1.1 Rivers mouths                                                    |                                        |
|                         |                                              | 5.2.3 Ocean                          | 5.2.3.1 Ocean                                  | 5.2.3.1.1 Ocean                                                            |                                        |

**S2. FACTOR C (USLE) – ADAPTATION FROM PIMENTA 1999**

| COS 2007 LULC class                                        | Factor_C Pimenta (1999) | LULC classes from Pimenta (1999) | Refined Factor C | Method for Refinement |
|------------------------------------------------------------|-------------------------|----------------------------------|------------------|-----------------------|
| 1.1.1.1.1 Continuous urban fabric predominantly vertical   | 0,005                   | 1.1.1                            | 0,005            | No refinement         |
| 1.1.1.2.1 Continuous urban fabric predominantly horizontal | 0,005                   | 1.1.1                            | 0,005            |                       |
| 1.1.1.3.1 Parking lots and yards                           | 0,005                   | 1.1.1                            | 0,005            |                       |
| 1.1.2.1.1 Discontinuous urban fabric                       | 0,010                   | 1.1.2                            | 0,010            |                       |
| 1.1.2.2.1 Sparse discontinuous urban fabric                | 0,010                   | 1.1.2                            | 0,010            |                       |
| 1.2.1.1.1 Industrial units                                 | 0,010                   | 1.2.1                            | 0,010            |                       |
| 1.2.1.2.1 Commercial units                                 | 0,010                   | 1.2.1                            | 0,010            |                       |
| 1.2.1.3.1 Agricultural facilities                          | 0,010                   | 1.2.1                            | 0,010            |                       |
| 1.2.1.4.1 Public and private facilities                    | 0,010                   | 1.2.1                            | 0,010            |                       |
| 1.2.1.5.1 Renewable energy production infrastructure       | 0,010                   | 1.2.1                            | 0,010            |                       |
| 1.2.1.5.2 Non-renewable energy production infrastructure   | 0,010                   | 1.2.1                            | 0,010            |                       |
| 1.2.1.6.1 Water supply infrastructure                      | 0,010                   | 1.2.1                            | 0,010            |                       |
| 1.2.1.7.1 Waste and wastewater treatment infrastructure    | 0,010                   | 1.2.1                            | 0,010            |                       |
| 1.2.2.1.1 Road network and associated land                 | 0,010                   | 1.2.2                            | 0,010            |                       |
| 1.2.2.2.1 Rail network and associated land                 | 0,010                   | 1.2.2                            | 0,010            |                       |
| 1.2.3.1.1 Sea and river ports                              | 0,010                   | 1.2.3                            | 0,010            |                       |
| 1.2.3.2.1 Ship construction and repairment docks           | 0,010                   | 1.2.3                            | 0,010            |                       |
| 1.2.3.3.1 Marinas and fishing harbors                      | 0,010                   | 1.2.3                            | 0,010            |                       |
| 1.2.4.1.1 Airports                                         | 0,010                   | 1.2.4                            | 0,010            |                       |
| 1.2.4.2.1 Airfields                                        | 0,010                   | 1.2.4                            | 0,010            |                       |
| 1.3.1.1.1 Surface mines                                    | 0,500                   | 1.3.1                            | 0,500            |                       |
| 1.3.1.2.1 Quarries                                         | 0,500                   | 1.3.1                            | 0,500            |                       |
| 1.3.2.1.1 Landfills                                        | 0,100                   | 1.3.2                            | 0,100            |                       |
| 1.3.2.2.1 Dumps and scrap yards                            | 0,100                   | 1.3.2                            | 0,100            |                       |
| 1.3.3.1.1 Construction sites                               | 0,010                   | 1.3.3                            | 0,010            |                       |
| 1.3.3.2.1 Abandoned sites in artificial areas              | 0,500                   | 1.3.4                            | 0,500            |                       |
| 1.4.1.1.1 Parks and gardens                                | 0,020                   | 1.4.2                            | 0,020            |                       |
| 1.4.1.2.1 Cemeteries                                       | 0,020                   | 1.4.1                            | 0,020            |                       |
| 1.4.2.1.1 Golf courses                                     | 0,010                   | 1.2.5                            | 0,010            |                       |
| 1.4.2.1.2 Other sports facilities                          | 0,010                   | 1.2.5                            | 0,010            |                       |
| 1.4.2.2.1 Campsites                                        | 0,010                   | 1.2.5                            | 0,010            |                       |
| 1.4.2.2.2 Other leisure facilities                         | 0,010                   | 1.2.5                            | 0,010            |                       |
| 1.4.2.3.1 Cultural facilities and historic zones           | 0,010                   | 1.2.5                            | 0,010            |                       |
| 2.1.1.1.1 Non-irrigated arable land                        | 0,400                   | 2.1.1                            | 0,400            |                       |
| 2.1.1.2.1 Greenhouses and nurseries                        | 0,001                   | 2.1.4                            | 0,001            |                       |
| 2.1.2.1.1 Irrigated arable land                            | 0,200                   | 2.1.2                            | 0,200            |                       |
| 2.1.3.1.1 Rice fields                                      | 0,050                   | 2.1.3                            | 0,050            |                       |
| 2.2.1.1.1 Vineyards                                        | 0,200                   | 2.2.1                            | 0,200            |                       |
| 2.2.1.2.1 Vineyards with orchards                          | 0,150                   | 2.2.1/2                          | 0,150            |                       |
| 2.2.1.3.1 Vineyards with olive groves                      | 0,200                   | 2.2.1/3                          | 0,200            |                       |



| COS 2007 LULC class                                              | Factor_C Pimenta (1999) | LULC classes from Pimenta (1999) | Refined Factor C | Method for Refinement |
|------------------------------------------------------------------|-------------------------|----------------------------------|------------------|-----------------------|
| 2.2.2.1.1 Fresh fruit orchards                                   | 0,050                   | 2.2.2                            | 0,050            |                       |
| 2.2.2.1.2 Almond orchards                                        | 0,050                   | 2.2.2.4                          | 0,050            |                       |
| 2.2.2.1.3 Sweet chestnut orchards                                | 0,050                   | 2.2.2                            | 0,050            |                       |
| 2.2.2.1.4 Carob orchards                                         | 0,050                   | 2.2.2.6                          | 0,050            |                       |
| 2.2.2.1.5 Citrus orchards                                        | 0,050                   | 2.2.2.1                          | 0,050            |                       |
| 2.2.2.1.6 Other orchards                                         | 0,050                   | 2.2.2.2                          | 0,050            |                       |
| 2.2.2.2.1 Fresh fruit orchards with vineyards                    | 0,100                   | 2.2.2/1                          | 0,100            |                       |
| 2.2.2.2.2 Almond orchards with vineyards                         | 0,100                   | 2.2.2/1                          | 0,100            |                       |
| 2.2.2.2.3 Sweet chestnut orchards with vineyards                 | 0,100                   | 2.2.2/1                          | 0,100            |                       |
| 2.2.2.2.4 Carob orchards with vineyards                          | 0,100                   | 2.2.2/1                          | 0,100            |                       |
| 2.2.2.2.5 Citrus orchards with vineyards                         | 0,100                   | 2.2.2/1                          | 0,100            |                       |
| 2.2.2.2.6 Other orchards with vineyards                          | 0,100                   | 2.2.2/1                          | 0,100            |                       |
| 2.2.2.3.1 Fresh fruit orchards with olive groves                 | 0,100                   | 2.2.2/3                          | 0,100            |                       |
| 2.2.2.3.2 Almond orchards with olive groves                      | 0,100                   | 2.2.2/3                          | 0,100            |                       |
| 2.2.2.3.3 Sweet chestnut orchards with olive groves              | 0,100                   | 2.2.2/3                          | 0,100            |                       |
| 2.2.2.3.4 Carob orchards with olive groves                       | 0,100                   | 2.2.2/3                          | 0,100            |                       |
| 2.2.2.3.5 Citrus orchards with olive groves                      | 0,100                   | 2.2.2/3                          | 0,100            |                       |
| 2.2.2.3.6 Other orchards with olive groves                       | 0,100                   | 2.2.2/3                          | 0,100            |                       |
| 2.2.3.1.1 Olive groves                                           | 0,100                   | 2.2.3                            | 0,100            |                       |
| 2.2.3.2.1 Olive groves with vineyards                            | 0,100                   | 2.2.3/1                          | 0,100            |                       |
| 2.2.3.3.1 Olive groves with orchards                             | 0,100                   | 2.2.3/2                          | 0,100            |                       |
| 2.3.1.1.1 Permanent pastures                                     | 0,020                   | 2.3                              | 0,020            |                       |
| 2.4.1.1.1 Non-irrigated arable land associated with vineyards    | 0,300                   | 2.4.1/1                          | 0,300            |                       |
| 2.4.1.1.2 Non-irrigated arable land associated with orchards     | 0,200                   | 2.2.2.0                          | 0,200            |                       |
| 2.4.1.1.3 Non-irrigated arable land associated with olive groves | 0,200                   | 2.4.1/3                          | 0,200            |                       |
| 2.4.1.2.1 Irrigated arable land associated with vineyards        | 0,300                   | 2.4.1/1                          | 0,300            |                       |
| 2.4.1.2.2 Irrigated arable land associated with orchards         | 0,200                   | 2.2.2.0                          | 0,200            |                       |
| 2.4.1.2.3 Irrigated arable land associated with olive groves     | 0,200                   | 2.4.1/3                          | 0,200            |                       |
| 2.4.1.3.1 Pastures associated with vineyards                     | 0,300                   | 2.2.3/0                          | 0,300            |                       |
| 2.4.1.3.2 Pastures associated with orchards                      | 0,020                   | 2.2.3/0                          | 0,020            |                       |
| 2.4.1.3.3 Pastures associated with olive groves                  | 0,020                   | 2.2.3/0                          | 0,020            |                       |

| COS 2007 LULC class                                                | Factor_C Pimenta (1999) | LULC classes from Pimenta (1999) | Refined Factor C | Method for Refinement                                 |
|--------------------------------------------------------------------|-------------------------|----------------------------------|------------------|-------------------------------------------------------|
| 2.4.2.1.1 Complex cultivation patterns                             | 0,200                   | 2.4.2                            | 0,200            |                                                       |
| 2.4.3.1.1 Agriculture with natural and semi-natural vegetation     | 0,300                   | 2.4                              | 0,300            |                                                       |
| 2.4.4.1.1 AFS of cork oak with non-irrigated arable land           | 0,200                   | 2.5.2/1-8                        | 0,250            | Value for Arable-Montado from Bakker et al. (2008)    |
| 2.4.4.1.2 AFS of holm oak with non-irrigated arable land           | 0,200                   | 2.5.2/1-8                        | 0,250            | Value for Arable-Montado from Bakker et al. (2008)    |
| 2.4.4.1.3 AFS of other oaks with non-irrigated arable land         | 0,200                   | 2.5.2/1-8                        | 0,250            | Value for Arable-Montado from Bakker et al. (2008)    |
| 2.4.4.1.4 AFS of other species with non-irrigated arable land      | 0,200                   | 2.5.2/1-8                        | 0,250            | Value for Arable-Montado from Bakker et al. (2008)    |
| 2.4.4.1.5 AFS of cork and holm oaks with non-irrigated arable land | 0,200                   | 2.5.2/1-8                        | 0,250            | Value for Arable-Montado from Bakker et al. (2008)    |
| 2.4.4.1.6 AFS of other mixtures with non-irrigated arable land     | 0,200                   | 2.5.2/1-8                        | 0,250            | Value for Arable-Montado from Bakker et al. (2008)    |
| 2.4.4.2.1 AFS of cork oak with irrigated arable land               | 0,200                   | 2.5.2/1-8                        | 0,250            | Value for Arable-Montado from Bakker et al. (2008)    |
| 2.4.4.2.2 AFS of holm oak with irrigated arable land               | 0,200                   | 2.5.2/1-8                        | 0,250            | Value for Arable-Montado from Bakker et al. (2008)    |
| 2.4.4.2.3 AFS of other oaks with irrigated arable land             | 0,200                   | 2.5.2/1-8                        | 0,250            | Value for Arable-Montado from Bakker et al. (2008)    |
| 2.4.4.2.4 AFS of other species with irrigated arable land          | 0,200                   | 2.5.2/1-8                        | 0,250            | Value for Arable-Montado from Bakker et al. (2008)    |
| 2.4.4.2.5 AFS of cork and holm oaks with irrigated arable land     | 0,200                   | 2.5.2/1-8                        | 0,250            | Value for Arable-Montado from Bakker et al. (2008)    |
| 2.4.4.2.6 AFS of other mixtures with irrigated arable land         | 0,200                   | 2.5.2/1-8                        | 0,250            | Value for Arable-Montado from Bakker et al. (2008)    |
| 2.4.4.3.1 AFS of cork oak with pastures                            | 0,300                   | 2.5                              | 0,010            | Value for Grassland-Montado from Bakker et al. (2008) |
| 2.4.4.3.2 AFS of holm oak with pastures                            | 0,300                   | 2.5                              | 0,010            | Value for Grassland-Montado from Bakker et al. (2008) |
| 2.4.4.3.3 AFS of other oaks with pastures                          | 0,300                   | 2.5                              | 0,010            | Value for Grassland-Montado from Bakker et al. (2008) |
| 2.4.4.3.4 AFS of other species with pastures                       | 0,300                   | 2.5                              | 0,010            | Value for Grassland-Montado from Bakker et al. (2008) |

| COS 2007 LULC class                                                     | Factor_C Pimenta (1999) | LULC classes from Pimenta (1999) | Refined Factor C | Method for Refinement                                     |
|-------------------------------------------------------------------------|-------------------------|----------------------------------|------------------|-----------------------------------------------------------|
| 2.4.4.3.5 AFS of cork and holm oaks with pastures                       | 0,300                   | 2.5                              | 0,010            | Value for Grassland-Montado from Bakker et al. (2008)     |
| 2.4.4.3.6 AFS of other mixtures with pastures                           | 0,300                   | 2.5                              | 0,010            | Value for Grassland-Montado from Bakker et al. (2008)     |
| 2.4.4.4.1 AFS of cork oak with permanent crops                          | 0,300                   | 2.5                              | 0,010            | Value for Grassland-Montado from Bakker et al. (2008)     |
| 2.4.4.4.2 AFS of holm oak with permanent crops                          | 0,300                   | 2.5                              | 0,010            | Value for Grassland-Montado from Bakker et al. (2008)     |
| 2.4.4.4.3 AFS of other oaks with permanent crops                        | 0,300                   | 2.5                              | 0,010            | Value for Grassland-Montado from Bakker et al. (2008)     |
| 2.4.4.4.4 AFS of other species with permanent crops                     | 0,300                   | 2.5                              | 0,010            | Value for Grassland-Montado from Bakker et al. (2008)     |
| 2.4.4.4.5 AFS of cork and holm oaks with permanent crops                | 0,300                   | 2.5                              | 0,010            | Value for Grassland-Montado from Bakker et al. (2008)     |
| 2.4.4.4.6 AFS of other mixtures with permanent crops                    | 0,300                   | 2.5                              | 0,010            | Value for Grassland-Montado from Bakker et al. (2008)     |
| 3.1.1.1.1 Cork oak forests                                              | 0,100                   | 3.1.1                            | 0,100            | No refinement                                             |
| 3.1.1.1.2 Holm oak forests                                              | 0,100                   | 3.1.2                            | 0,100            |                                                           |
| 3.1.1.1.3 Forests of other oaks                                         | 0,100                   | 3.1.5                            | 0,100            |                                                           |
| 3.1.1.1.4 Sweet chestnut forests                                        | 0,100                   | 3.1.3                            | 0,100            |                                                           |
| 3.1.1.1.5 Eucalyptus forests                                            | 0,200                   | 3.1.6                            | 0,200            |                                                           |
| 3.1.1.1.6 Forests of invasive species                                   | 0,100                   | 3.1                              | 0,100            |                                                           |
| 3.1.1.1.7 Forests of other broad-leaved species                         | 0,100                   | 3.1.7                            | 0,100            |                                                           |
| 3.1.1.2.1 Forests of cork oak with broad-leaved trees                   | 0,100                   | 3.1                              | 0,100            |                                                           |
| 3.1.1.2.2 Forests of holm oak with broad-leaved trees                   | 0,100                   | 3.1                              | 0,100            |                                                           |
| 3.1.1.2.3 Forests of other oaks with broad-leaved trees                 | 0,100                   | 3.1                              | 0,100            |                                                           |
| 3.1.1.2.4 Forests of sweet chestnut with broad-leaved trees             | 0,100                   | 3.1                              | 0,100            | Mean Factor C of related LULC classes from Pimenta (1999) |
| 3.1.1.2.5 Forests of eucalyptus with broad-leaved trees                 | 0,100                   | 3.1                              | 0,150            |                                                           |
| 3.1.1.2.6 Forests of invasive species with broad-leaved trees           | 0,100                   | 3.1                              | 0,100            |                                                           |
| 3.1.1.2.7 Forests of other broad-leaved species with broad-leaved trees | 0,100                   | 3.1                              | 0,100            |                                                           |
| 3.1.2.1.1 Maritime pine forests                                         | 0,050                   | 3.2.1                            | 0,050            |                                                           |
| 3.1.2.1.2 Stone pine forests                                            | 0,050                   | 3.2.2                            | 0,050            | No refinement                                             |
| 3.1.2.1.3 Forests of other coniferous species                           | 0,050                   | 3.2.3                            | 0,050            |                                                           |

| COS 2007 LULC class                                                   | Factor_C Pimenta (1999) | LULC classes from Pimenta (1999) | Refined Factor C | Method for Refinement                                     |
|-----------------------------------------------------------------------|-------------------------|----------------------------------|------------------|-----------------------------------------------------------|
| 3.1.2.2.1 Forests of maritime pine with coniferous trees              | 0,050                   | 3.2                              | 0,050            |                                                           |
| 3.1.2.2.2 Forests of stone pine with coniferous trees                 | 0,050                   | 3.2                              | 0,050            |                                                           |
| 3.1.2.2.3 Forests of other coniferous species with coniferous trees   | 0,050                   | 3.2                              | 0,050            |                                                           |
| 3.1.3.1.1 Forests of cork oak with coniferous trees                   | 0,050                   | 3.3                              | 0,050            |                                                           |
| 3.1.3.1.2 Forests of holm oak with coniferous trees                   | 0,050                   | 3.3                              | 0,050            |                                                           |
| 3.1.3.1.3 Forests of other oaks with coniferous trees                 | 0,050                   | 3.3                              | 0,050            |                                                           |
| 3.1.3.1.4 Forests of sweet chestnut with coniferous trees             | 0,050                   | 3.3                              | 0,050            |                                                           |
| 3.1.3.1.5 Forests of eucalyptus with coniferous trees                 | 0,050                   | 3.3                              | 0,125            | Mean Factor C of related LULC classes from Pimenta (1999) |
| 3.1.3.1.6 Forests of invasive species with coniferous trees           | 0,050                   | 3.3                              | 0,050            | No refinement                                             |
| 3.1.3.1.7 Forests of other broad-leaved species with coniferous trees | 0,050                   | 3.3                              | 0,050            |                                                           |
| 3.1.3.1.8 Forests of broad-leaved mixtures with coniferous trees      | 0,050                   | 3.3                              | 0,050            |                                                           |
| 3.1.3.2.1 Forests of maritime pine with broad-leaved trees            | 0,050                   | 3.3                              | 0,050            |                                                           |
| 3.1.3.2.2 Forests of stone pine with broad-leaved trees               | 0,050                   | 3.3                              | 0,050            |                                                           |
| 3.1.3.2.3 Forests of other coniferous species with broad-leaved trees | 0,050                   | 3.3                              | 0,050            |                                                           |
| 3.1.3.2.4 Forests of coniferous mixtures with broad-leaved trees      | 0,050                   | 3.3                              | 0,050            |                                                           |
| 3.2.1.1.1 Natural herbaceous vegetation                               | 0,050                   | 4.1.1                            | 0,050            |                                                           |
| 3.2.2.1.1 Closed shrublands                                           | 0,020                   | 4.1.2                            | 0,010            | Value for Dense shrub in Bakker et al. (2008)             |
| 3.2.2.2.1 Open shrublands                                             | 0,020                   | 4.1.2                            | 0,100            | Value for Dense shrub in Bakker et al. (2008)             |
| 3.2.3.1.1 Closed sclerophyllous vegetation                            | 0,020                   | 4.1.3                            | 0,010            | Value for Dense shrub in Bakker et al. (2008)             |
| 3.2.3.2.1 Open sclerophyllous vegetation                              | 0,020                   | 4.1.3                            | 0,100            | Value for Dense shrub in Bakker et al. (2008)             |
| 3.2.4.1.1 Cork oak open forests                                       | 0,100                   | 4.1.4                            | 0,100            | No refinement                                             |
| 3.2.4.1.2 Holm oak open forests                                       | 0,100                   | 4.1.4                            | 0,100            |                                                           |
| 3.2.4.1.3 Open forests of other oaks                                  | 0,100                   | 4.1.4                            | 0,100            |                                                           |
| 3.2.4.1.4 Sweet chestnut open forests                                 | 0,100                   | 4.1.4                            | 0,100            |                                                           |
| 3.2.4.1.5 Eucalyptus open forests                                     | 0,100                   | 4.1.4                            | 0,100            |                                                           |
| 3.2.4.1.6 Open forests of invasive species                            | 0,100                   | 4.1.4                            | 0,100            |                                                           |
| 3.2.4.1.7 Open forests of other broad-leaved species                  | 0,100                   | 4.1.4                            | 0,100            |                                                           |

| COS 2007 LULC class                                                          | Factor_C Pimenta (1999) | LULC classes from Pimenta (1999) | Refined Factor C | Method for Refinement |
|------------------------------------------------------------------------------|-------------------------|----------------------------------|------------------|-----------------------|
| 3.2.4.2.1 Open forests of cork oak with broad-leaved trees                   | 0,100                   | 4.1.4                            | 0,100            |                       |
| 3.2.4.2.2 Open forests of holm oak with broad-leaved trees                   | 0,100                   | 4.1.4                            | 0,100            |                       |
| 3.2.4.2.3 Open forests of other oaks with broad-leaved trees                 | 0,100                   | 4.1.4                            | 0,100            |                       |
| 3.2.4.2.4 Open forests of sweet chestnut with broad-leaved trees             | 0,100                   | 4.1.4                            | 0,100            |                       |
| 3.2.4.2.5 Open forests of eucalyptus with broad-leaved trees                 | 0,100                   | 4.1.4                            | 0,100            |                       |
| 3.2.4.2.6 Open forests of invasive species with broad-leaved trees           | 0,100                   | 4.1.4                            | 0,100            |                       |
| 3.2.4.2.7 Open forests of other broad-leaved species with broad-leaved trees | 0,100                   | 4.1.4                            | 0,100            |                       |
| 3.2.4.3.1 Maritime pine open forests                                         | 0,100                   | 4.1.4                            | 0,100            |                       |
| 3.2.4.3.2 Stone pine open forests                                            | 0,100                   | 4.1.4                            | 0,100            |                       |
| 3.2.4.3.3 Open forests of other coniferous species                           | 0,100                   | 4.1.4                            | 0,100            |                       |
| 3.2.4.4.1 Open forests of maritime pine with coniferous trees                | 0,100                   | 4.1.4                            | 0,100            |                       |
| 3.2.4.4.2 Open forests of stone pine with coniferous trees                   | 0,100                   | 4.1.4                            | 0,100            |                       |
| 3.2.4.4.3 Open forests of other coniferous species with coniferous trees     | 0,100                   | 4.1.4                            | 0,100            |                       |
| 3.2.4.5.1 Open forests of cork oak with coniferous trees                     | 0,100                   | 4.1.4                            | 0,100            |                       |
| 3.2.4.5.2 Open forests of holm oak with coniferous trees                     | 0,100                   | 4.1.4                            | 0,100            |                       |
| 3.2.4.5.3 Open forests of other oaks with coniferous trees                   | 0,100                   | 4.1.4                            | 0,100            |                       |
| 3.2.4.5.4 Open forests of sweet chestnut with coniferous trees               | 0,100                   | 4.1.4                            | 0,100            |                       |
| 3.2.4.5.5 Open forests of eucalyptus with coniferous trees                   | 0,100                   | 4.1.4                            | 0,100            |                       |
| 3.2.4.5.6 Open forests of invasive species with coniferous trees             | 0,100                   | 4.1.4                            | 0,100            |                       |
| 3.2.4.5.7 Open forests of other broad-leaved species with coniferous trees   | 0,100                   | 4.1.4                            | 0,100            |                       |
| 3.2.4.5.8 Open forests of broad-leaved mixtures with coniferous trees        | 0,100                   | 4.1.4                            | 0,100            |                       |
| 3.2.4.6.1 Open forests of maritime pine with broad-leaved trees              | 0,100                   | 4.1.4                            | 0,100            |                       |
| 3.2.4.6.2 Open forests of stone pine with broad-leaved trees                 | 0,100                   | 4.1.4                            | 0,100            |                       |
| 3.2.4.6.3 Open forests of other coniferous species with broad-leaved trees   | 0,100                   | 4.1.4                            | 0,100            |                       |

| COS 2007 LULC class                                                   | Factor_C Pimenta (1999) | LULC classes from Pimenta (1999) | Refined Factor C | Method for Refinement |
|-----------------------------------------------------------------------|-------------------------|----------------------------------|------------------|-----------------------|
| 3.2.4.6.4 Open forests of coniferous mixtures with broad-leaved trees | 0,100                   | 4.1.4                            | 0,100            |                       |
| 3.2.4.7.1 Other woody vegetation                                      | 0,100                   | 4.1.4                            | 0,100            |                       |
| 3.2.4.8.1 Clearcuts                                                   | 0,400                   | 4.2                              | 0,400            |                       |
| 3.2.4.8.2 Young plantations                                           | 0,400                   | 4.2                              | 0,400            |                       |
| 3.2.4.9.1 Forest nurseries                                            | 0,100                   | 4.1.4                            | 0,100            |                       |
| 3.2.4.10.1 Firebreaks                                                 | 0,400                   | 4.1.4                            | 0,400            |                       |
| 3.3.1.1.1 Inland beaches, dunes and sand plains                       | 0,050                   | 4.2.1                            | 0,050            |                       |
| 3.3.1.2.1 Coastal beaches, dunes and sand plains                      | 0,050                   | 4.2.1                            | 0,050            |                       |
| 3.3.2.1.1 Bare rock                                                   | 0,010                   | 4.2.2                            | 0,010            |                       |
| 3.3.3.1.1 Sparsely vegetated areas                                    | 0,400                   | 4                                | 0,400            |                       |
| 3.3.4.1.1 Burnt areas                                                 | 0,500                   | 4.3                              | 0,500            |                       |
| 4.1.1.1.1 Inland marshes                                              | 0,005                   | 5.1                              | 0,005            |                       |
| 4.1.2.1.1 Peat bogs                                                   | 0,005                   | 5.1                              | 0,005            |                       |
| 4.2.1.1.1 Salt marshes                                                | 0,005                   | 5.2.1                            | 0,005            |                       |
| 4.2.2.1.1 Salines                                                     | 0,005                   | 5.2.2                            | 0,005            |                       |
| 4.2.2.2.1 Coastal aquaculture                                         | 0,005                   | 5.2                              | 0,005            |                       |
| 4.2.3.1.1 Intertidal flats                                            | 0,005                   | 5.2.3                            | 0,005            |                       |
| 5.1.1.1.1 Natural water courses                                       | 0,000                   | 6.1.1                            | 0,000            |                       |
| 5.1.1.2.1 Artificial water channels                                   | 0,000                   | 6.1                              | 0,000            |                       |
| 5.1.2.1.1 Artificial inland lakes and lagoons                         | 0,000                   | 6.1.2                            | 0,000            |                       |
| 5.1.2.1.2 Natural inland lakes and lagoons                            | 0,000                   | 6.1.2                            | 0,000            |                       |
| 5.1.2.2.1 Barrage reservoirs                                          | 0,000                   | 6.1.2                            | 0,000            |                       |
| 5.1.2.3.1 Small dam reservoirs                                        | 0,000                   | 6.1.2                            | 0,000            |                       |
| 5.1.2.3.2 Artificial ponds                                            | 0,000                   | 6.1.2                            | 0,000            |                       |
| 5.1.2.3.3 Inland aquaculture                                          | 0,000                   | 6.1.2                            | 0,000            |                       |
| 5.2.1.1.1 Coastal lagoons                                             | 0,000                   | 6.2.1                            | 0,000            |                       |
| 5.2.2.1.1 Rivers mouths                                               | 0,000                   | 6.2.2                            | 0,000            |                       |
| 5.2.3.1.1 Ocean                                                       | 0,000                   | 6.2.3                            | 0,000            |                       |

### S3 CONVERSION FACTOR FOR BIOMASS TO CARBON

| Kyoto Protocol LULC typologies | BEF <sup>1</sup> | RTS <sup>2</sup> | CF <sup>3</sup> | AGB <sup>4</sup> | BGB <sup>5</sup> | Litter |
|--------------------------------|------------------|------------------|-----------------|------------------|------------------|--------|
| 01.Pinus pinaster              | 0.528            | 0.098            | 0.51            | 26.74            | 3.33             | 2.96   |
| 02.Quercus suber               | 1.239            | 0.133            | 0.48            | 20.04            | 3.03             | 2.04   |
| 03.Eucalyptus                  | 0.63             | 0.249            | 0.48            | 17.97            | 3.88             | 1.85   |
| 04.Quercus rotundifolia        | 0.797            | 0.748            | 0.48            | 8.37             | 5.03             | 2.04   |
| 05.Other quercus               | 0.9              | 0.327            | 0.48            | 15.87            | 4.83             | 1.85   |
| 06.Other broadleaves           | 0.825            | 0.502            | 0.48            | 30.79            | 7.67             | 1.85   |
| 07.Pinus pinea                 | 1.166            | 0.054            | 0.51            | 18.79            | 1.96             | 2.41   |
| 08.Other coniferous            | 0.532            | 0.102            | 0.51            | 14.51            | 1.62             | 2.96   |
| 09.Rain-fed crops              |                  |                  | 0.47            | 0.31             | 0.31             | 0.33   |
| 10.Irrigated Crops             |                  |                  | 0.47            | 0.31             | 0.31             | 0.33   |
| 11.Rice                        |                  |                  | 0.47            | 0.31             | 0.31             | 0.33   |
| 12.Vineyards                   |                  |                  | 0.47            | 3.34             | 2.87             | 0.33   |
| 13.Olive                       |                  |                  | 0.47            | 7.85             | 1.15             | 0.33   |
| 14.Other permanent             |                  |                  | 0.47            | 8.46             | 1.48             | 0.33   |
| 15.Grassland                   |                  |                  | 0.47            | 0.53             | 0.94             | 0.41   |
| 16.Wetlands                    |                  |                  | 0.47            | 0                | 0                | 0      |
| 17.Settlements                 |                  |                  | 0.47            | 0                | 0                | 0      |
| 18.Shrubland                   |                  |                  | 0.47            | 8.78             | 4.94             | 4.96   |
| 19.Other land                  |                  |                  | 0.47            | 1.05             | 0.59             | 2.07   |

Estimates from the NIR Report – APA (2014)

<sup>1</sup> BEF, biomass expansion factor; <sup>2</sup> RTS, root-to-shoot; <sup>3</sup> CF, carbon fraction (%); <sup>4</sup> AGB, aboveground biomass; <sup>5</sup> BGB, belowground biomass.

### S4. HARMONIZATION OF KYOTO PROTOCOL LAND-USE CLASSES WITH COS

| COS'07     | KP Classes           | COS'90                                                                |
|------------|----------------------|-----------------------------------------------------------------------|
| 2.1.1.01.1 | 09.Rain-fed crops    | CC1                                                                   |
| 2.1.1.02.1 | 10.Irrigated Crops   | CC9                                                                   |
| 2.1.2.01.1 | 10.Irrigated Crops   | CC2                                                                   |
| 2.1.3.01.1 | 11.Rice              | CC3                                                                   |
| 2.2.1.01.1 | 12.Vineyards         | VV1, V01, VA1, VO1                                                    |
| 2.2.2.01.1 | 14.Other permanent   | AA1, AA2, AA3, AA4, AA5, AA6, AA9, AAx, NN1, NN2, NN3, NN4 e NN6      |
| 2.2.2.01.6 | 14.Other permanent   | AX1                                                                   |
| 2.2.2.02.1 | 14.Other permanent   | AV1, AV2 e AV5                                                        |
| 2.2.2.02.6 | 14.Other permanent   | AVX                                                                   |
| 2.2.2.03.3 | 06.Other broadleaves | AO1, AO2, AO3, AO4, AO9 e AOx                                         |
| 2.2.2.03.6 | 14.Other permanent   | AO5                                                                   |
| 2.2.3.01.1 | 13.Olive             | OO1, OB1, OB3, OF1, OM1, ON1, OP1, OQ1 e OZ1                          |
| 2.2.3.02.1 | 13.Olive             | OV1                                                                   |
| 2.2.3.03.1 | 13.Olive             | OA1                                                                   |
| 2.2.3.03.1 | 13.Olive             | OA2 e OAX                                                             |
| 2.3.1.01.1 | 15.Grassland         | GG1                                                                   |
| 2.4.1.01.1 | 12.Vineyards         | CV1, CV2 e VC1                                                        |
| 2.4.1.01.2 | 14.Other permanent   | AC1, AC2, AC3, AC5, AC9, ACX, CA1, CA2, CA9, CAX, CN0, CN2, CZD e CZO |
| 2.4.1.01.3 | 13.Olive             | CO1, CO2, COX, OC1 e OC2                                              |
| 2.4.2.01.1 | 09.Rain-fed crops    | CX1 e CX0                                                             |
| 2.4.3.01.1 | 09.Rain-fed crops    | CI1, CI2 e C01                                                        |

| COS'07     | KP Classes              | COS'90                                                                                                                                                                                                                                                                                                                                                                                                                                                         |
|------------|-------------------------|----------------------------------------------------------------------------------------------------------------------------------------------------------------------------------------------------------------------------------------------------------------------------------------------------------------------------------------------------------------------------------------------------------------------------------------------------------------|
| 2.4.4.01.1 | 02.Quercus suber        | BC1, CB0, CE0, CF0, CM0, CP0, CQ0, CR0, CT0, CZ0, EC1, FC1, PC1, QC1, TC1, ZC1, BC3, CB1, CB2, CB3, CBC e CBO                                                                                                                                                                                                                                                                                                                                                  |
| 2.4.4.01.2 | 04.Quercus rotundifolia | CZ1, CZ2, CZ3, ZC0 e ZC3                                                                                                                                                                                                                                                                                                                                                                                                                                       |
| 2.4.4.01.4 | 06.Other broadleaves    | CD0CD1, CE3, CF1, CM1, CM3, CQ1, MC1, MC3, NC1 e NC2                                                                                                                                                                                                                                                                                                                                                                                                           |
| 2.4.4.02.2 | 04.Quercus rotundifolia | BC2, EC2, FC2, PC2, QC2 e ZC2                                                                                                                                                                                                                                                                                                                                                                                                                                  |
| 2.4.4.04.4 | 06.Other broadleaves    | BN1, BN2, BN3, EN1, EN2, EN3, FN1, FN2, FN3, MN2, MN3, NB2, NB3, NE2, NE3, NF1, NF2, NF3, NF4, NM2, NP1, NP2, NP3, NP4, NQ1, NQ2, NQ3, NQ4, NQ6, NR1, NR2, NR3, NT1, NT2, NT3, PN1, PN2, PN3, PN4, QN1, QN2, QN3, QN4, QN6, RN1, RN2, RN3, TN1, TN2, TN3 e ZN3                                                                                                                                                                                                 |
| 3.1.1.01.1 | 02.Quercus suber        | BB2, BB3, BB5, EE2, EE3, EE5, EE6, FF2, FF3, FF5, QQ2, QQ3, QQ5, TT2, TT3, TT6, ZZ2, ZZ3, BB                                                                                                                                                                                                                                                                                                                                                                   |
| 3.1.1.01.4 | 06.Other broadleaves    | NN5, BD2, BD3, BF5, BF6, BM2 e BO3                                                                                                                                                                                                                                                                                                                                                                                                                             |
| 3.1.1.02.2 | 04.Quercus rotundifolia | BE2, BE3, BF2, BF3, BQ2, BQ3, BQ6, BT2, BT3, BZ2, BZ3, BZ6, EB2, EB3, EF2, EF3, EF5, EF6, EQ2, EQ3, EQ6, ET3, EZ2, EZ3, FB2, FB3, FE2, FE3, FE5, FE6, FQ2, FQ3, FQ5, FQ6, FT2, FT3, FT5, FZ2, FZ3, QB2, QB3, QB6, QE2, QE3, QF2, QF3, QF5, QF6, QT2, QT3, QT6, QZ2, QZ3, TB2, TB3, TE2, TE3, TF2, TF3, TF6, TQ2, TQ3, TQ6, ZB2, ZB3, ZB5, ZE2, ZE3, ZF2, ZF3, ZQ2, ZQ3, ZQ6, ZA3, ZB4, ZB6, ZD2, ZD3, ZM2, ZM3, ZO2, ZO3, ZR2 e ZR3                            |
| 3.1.1.02.3 | 05.Other quercus        | QZ6                                                                                                                                                                                                                                                                                                                                                                                                                                                            |
| 3.1.1.02.4 | 06.Other broadleaves    | NO3 e NZ2                                                                                                                                                                                                                                                                                                                                                                                                                                                      |
| 3.1.1.02.5 | 03.Eucalyptus           | EB4 e ED3                                                                                                                                                                                                                                                                                                                                                                                                                                                      |
| 3.1.1.02.7 | 06.Other broadleaves    | DB2, DB3, DF3, FA3, FB5, FB6, FD3 e FZ6                                                                                                                                                                                                                                                                                                                                                                                                                        |
| 3.1.2.01.1 | 01.Pinus pinaster       | MM2, MM3, PP2, PP3, PP5, PP6, RR2, RR3, RR5 e RR6                                                                                                                                                                                                                                                                                                                                                                                                              |
| 3.1.2.02.2 | 07.Pinus pinea          | MP2, MP3, MR3, PM2, PM3, PR2, PR3, PR5, RP2 e RP3                                                                                                                                                                                                                                                                                                                                                                                                              |
| 3.1.3.01.1 | 02.Quercus suber        | BM3, BP2, BP3, BR3, EM2, EM3, EP2, EP3, EP5, ER3, FM2, FM3, FM5, FP2, FP3, FP5, FP6, FR2, FR3, FR5, FR6, QM2, QM3, QP2, QP3, QP5, QP6, QR2, QR3, QR5, QR6, TP2, TP3, TR3, ZP2, ZP3 e BR2                                                                                                                                                                                                                                                                       |
| 3.1.3.01.8 | 06.Other broadleaves    | DP2                                                                                                                                                                                                                                                                                                                                                                                                                                                            |
| 3.1.3.02.1 | 01.Pinus pinaster       | PA3, PD2 e PD3                                                                                                                                                                                                                                                                                                                                                                                                                                                 |
| 3.1.3.02.2 | 07.Pinus pinea          | ME2, ME3, MF2, MF3, MQ2, MQ3, PB2, PB3, PE2, PE3, PE5, PF2, PF3, PF5, PF6, PQ2, PQ, PQ5, PQ6, PT2, PT3, PZ2, PZ3, PZ6, RB3, RE3, RF2, RF3, RF5, RF6, RQ2, RQ3, RQ6, RT2, RZ3, MA2, MB2, MD2, MD3, MO3, MZ2 e MZ3                                                                                                                                                                                                                                               |
| 3.1.3.02.3 | 08.Other coniferous     | RB2, RM3 e RZ2                                                                                                                                                                                                                                                                                                                                                                                                                                                 |
| 3.2.1.01.1 | 15.Grassland            | II1, II4, ID0, III, IZ1 e IZO                                                                                                                                                                                                                                                                                                                                                                                                                                  |
| 3.2.2.01.1 | 18.Shrubland            | BB0, BF0, BP0, BQ0, BZ0, DD9, EE0, EF0, EM0, EP0, EQ0, EZ0, FE0, FF0, FP0, FQ0, FR0, IB0, IE0, IF0, II2, IM0, IN0, IP0, IQ0, IR0, IT0, IZ0, MM0, MP0<br>NN0, NP0, NQ0, PB0, PE0, PF0, PM0, PN0, PP0, PQ0, PR0, PT0, QB0, QF0, QN0, QP0, QQ0, RF0, RQ0, RR0, TP0, TT0, ZP0, ZZ0, AO0, BBO, BD0, BE0, BM0, BN0, DB0, EB0, FB0, FM0, FZ0, IBO, IC1, IC2, IPO, IQ1, JB4, JI1, JJ9, JO0, JPO, JY1, MB0, MF0, MZ0, NB0, OB0, OZ0, QZ0, VB0, ZB0, ZF0, ZQ0, ZZO e BB6 |
| 3.2.3.01.1 | 18.Shrubland            | DD1, FF6, IO0, QQ6 e ZZ6                                                                                                                                                                                                                                                                                                                                                                                                                                       |
| 3.2.3.02.1 | 18.Shrubland            | IO e IO1                                                                                                                                                                                                                                                                                                                                                                                                                                                       |
| 3.2.4.01.1 | 02.Quercus suber        | BB1, EE1, FF1, QQ1, TT1, ZZ1                                                                                                                                                                                                                                                                                                                                                                                                                                   |
| 3.2.4.02.1 | 02.Quercus suber        | BD1, BE1, BM1 e BO1                                                                                                                                                                                                                                                                                                                                                                                                                                            |
| 3.2.4.02.2 | 04.Quercus rotundifolia | BF1, BQ1, BZ1, EB1, EF1, EQ1, ET1, EZ1, FB1, FE1, FQ1, FT1, FZ1, QB1, QE1, QF1, QT1, QZ1, TB1, TF1, TQ1, ZB1, ZF1, ZQ1, ZD1, ZN1 e ZO1                                                                                                                                                                                                                                                                                                                         |
| 3.2.4.02.4 | 06.Other broadleaves    | NO1, DA1, DB1, DE1 e DZ1                                                                                                                                                                                                                                                                                                                                                                                                                                       |
| 3.2.4.03.3 | 08.Other coniferous     | MM1, PP1 e RR1                                                                                                                                                                                                                                                                                                                                                                                                                                                 |
| 3.2.4.04.1 | 01.Pinus pinaster       | PM1                                                                                                                                                                                                                                                                                                                                                                                                                                                            |
| 3.2.4.04.2 | 07.Pinus pinea          | MP1                                                                                                                                                                                                                                                                                                                                                                                                                                                            |



| COS'07     | KP Classes           | COS'90                                                                                                                                                                                                                                               |
|------------|----------------------|------------------------------------------------------------------------------------------------------------------------------------------------------------------------------------------------------------------------------------------------------|
| 3.2.4.05.5 | 03.Eucalyptus        | BP1, BR1, EM1, EP1, FM1, FP1, FR1, QM1, QP1, QR1 ,TP1 e ZP1                                                                                                                                                                                          |
| 3.2.4.05.7 | 06.Other broadleaves | DP1                                                                                                                                                                                                                                                  |
| 3.2.4.06.1 | 01.Pinus pinaster    | PB1, PB5, PD1, PE1, PF1, PQ1, PZ0 e PZ1                                                                                                                                                                                                              |
| 3.2.4.06.2 | 07.Pinus pinea       | MB1, MB3, MF1 e MZ1                                                                                                                                                                                                                                  |
| 3.3.1.01.1 | 19.Other land        | JY1,                                                                                                                                                                                                                                                 |
| 3.3.2.01.1 | 19.Other land        | JY2                                                                                                                                                                                                                                                  |
| 3.3.3.01.1 | 19.Other land        | JB0, JE0, JF0, JM0, JN0, JP0, JQ0, JR0, JT0 e JZ0                                                                                                                                                                                                    |
| 3.3.4.01.1 | 18.Shrubland         | BB4, BP4, BQ4, BT4, BZ4 ,EE4, EF4, EP4, FE4, FF4, FM4, FP4, FQ4, FR4, IE4, IF4, IO4, IP4, IQ4, IZ4, JP4, MF4, MM4, MP4, PB4, PE4, PF4, PM4, PP4, PQ4, PR4, PT4, PZ4, QB4, QF4, QM4, QP4, QQ4, QR4, QT4, QZ4, RF4, RP4, RQ4, RR4, TT4, ZP4, ZQ4 e ZZ4 |

## S5. "PURE"CROPS AND LULC

| EUNIS ptMAES N                                                   | COS07N5                                                         | Classes puras atribuídas |
|------------------------------------------------------------------|-----------------------------------------------------------------|--------------------------|
| FB.4 : Vineyards                                                 | 2.2.1.01.1 Vinhas                                               | Sim                      |
|                                                                  | 2.2.1.02.1 Vinhas com pomar                                     | x                        |
|                                                                  | 2.2.1.03.1 Vinhas com olival                                    | x                        |
| G1.D1 : [Castanea sativa] plantations                            | 2.2.2.01.3 Pomares de castanheiro                               | Sim                      |
| G1.D1 : [Castanea sativa] plantations                            | 2.2.2.03.3 Pomares de castanheiro com olival                    | x                        |
| G1.7D : [Castanea sativa] woodland                               | 3.1.1.01.4 Florestas de castanheiro                             | x                        |
|                                                                  | 3.1.1.02.4 Florestas de castanheiro com folhosas                | x                        |
|                                                                  | 3.2.4.01.4 Florestas abertas de castanheiro                     | x                        |
|                                                                  | 3.2.4.02.4 Florestas abertas de castanheiro com folhosas        | x                        |
|                                                                  | 2.2.2.01.1 Pomares de frutos frescos                            | Sim                      |
| G1.D4 : Fruit orchards                                           | 2.2.2.02.1 Pomares de frutos frescos com vinha                  | x                        |
|                                                                  | 2.2.2.03.1 Pomares de frutos frescos com olival                 | x                        |
|                                                                  | 2.2.2.01.6 Outros pomares                                       | Sim                      |
| G1.D5 : Other high-stem orchards                                 | 2.2.2.02.6 Outros pomares com vinha                             | x                        |
|                                                                  | 2.2.2.03.6 Outros pomares com olival                            | x                        |
|                                                                  | 2.2.3.01.1 Olivais                                              | Sim                      |
| G2.91 : [Olea europaea] groves                                   | 2.2.3.02.1 Olivais com vinha                                    | x                        |
|                                                                  | 2.2.3.03.1 Olivais com pomar                                    | x                        |
|                                                                  | 2.2.2.01.5 Pomares de citrinos                                  | Sim                      |
| G2.92 : Citrus orchards                                          | 2.2.2.03.5 Pomares de citrinos com olival                       | x                        |
|                                                                  | 2.1.2.01.1 Culturas temporárias de regadio                      | Sim                      |
| I1 : Arable land and market gardens                              | 2.1.1.01.1 Culturas temporárias de sequeiro                     | Sim                      |
|                                                                  | 2.4.1.01.1 Culturas temporárias de sequeiro associadas a vinha  | x                        |
|                                                                  | 2.4.1.01.2 Culturas temporárias de sequeiro associadas a pomar  | x                        |
|                                                                  | 2.4.1.01.3 Culturas temporárias de sequeiro associadas a olival | x                        |
|                                                                  | 2.4.1.02.1 Culturas temporárias de regadio associadas a vinha   | x                        |
|                                                                  | 2.4.1.02.2 Culturas temporárias de regadio associadas a pomar   | x                        |
|                                                                  | 2.4.1.02.3 Culturas temporárias de regadio associadas a olival  | x                        |
| I1.4 : Inundated or inundatable croplands, including rice fields | 2.1.3.01.1 Arrozaís                                             | Sim                      |

## S6 RESULTS PER ECOSYSTEM TYPE/EUNIS HABITAT

The following tables present a breakdown of the area (and %) of different levels of EC and ES supply per ecosystem class (EUNIS classification).

| EUNIS class                                                           | Soil Organic Matter (tC/ha) |                   |                 |                |                  |                  |                  |                  |
|-----------------------------------------------------------------------|-----------------------------|-------------------|-----------------|----------------|------------------|------------------|------------------|------------------|
|                                                                       | 50 - 65                     | 65 - 70           | 70 - 75         | 75 - 80        | 80 - 85          | 85 - 90          | >90              | No Data          |
| <b>B1 Coastal dunes and sandy shores</b>                              | 27<br>0,67%                 | 7<br>0,18%        | 7<br>0,18%      | 5<br>0,13%     | 134<br>3,36%     | 180<br>4,50%     | 984<br>24,65%    | 2 647<br>66,33%  |
| <b>B3 Rock cliffs, ledges and shores, including the supralittoral</b> | <0,005<br>0,23%             | 0<br>0,00%        | 0<br>0,00%      | 0<br>0,00%     | 0<br>0,00%       | 0,04<br>0,04%    | 1,75<br>1,54%    | 112,12<br>98,20% |
| <b>E1 Dry grasslands</b>                                              | 357 520<br>81,86%           | 24 570<br>5,63%   | 11 458<br>2,62% | 5 776<br>1,32% | 25 481<br>5,83%  | 3 671<br>0,84%   | 844<br>0,19%     | 7 406<br>1,70%   |
| <b>E3 Seasonally wet and wet grasslands</b>                           | 2 251<br>69,26%             | 151<br>4,64%      | 23<br>0,72%     | 68<br>2,10%    | 513<br>15,80%    | 115<br>3,53%     | 27<br>0,82%      | 102<br>3,14%     |
| <b>E7 Sparsely wooded grasslands</b>                                  | 83 563<br>13,44%            | 440 351<br>70,85% | 667<br>0,11%    | 9 699<br>1,56% | 19 221<br>3,09%  | 32 648<br>5,25%  | 5.766<br>0,93%   | 29 611<br>4,76%  |
| <b>F3 Temperate and Mediterraneanmontane scrub</b>                    | 48<br>3,56%                 | 13<br>0,96%       | 4<br>0,27%      | 21<br>1,54%    | 100<br>7,38%     | 632<br>46,77%    | 505<br>37,37%    | 29<br>2,14%      |
| <b>F4 Temperate shrub heathland</b>                                   | 419<br>0,99%                | 498<br>1,18%      | 114<br>0,27%    | 384<br>0,91%   | 3 674<br>8,71%   | 14 674<br>34,77% | 22.004<br>52,15% | 430<br>1,02%     |
| <b>F5Maquis, arborescent matorral and thermoMediterranean brushes</b> | 684<br>1,12%                | 569<br>0,93%      | 103<br>0,17%    | 87<br>0,14%    | 13 120<br>21,40% | 19 845<br>32,37% | 26.073<br>42,53% | 820<br>1,34%     |
| <b>F6 Garrigue</b>                                                    | 349                         | 247               | 84              | 293            | 3 820            | 5 751            | 9.870            | 417              |

|                                                                                                            |                             |                           |                          |                         |                          |                          |                          |                          |
|------------------------------------------------------------------------------------------------------------|-----------------------------|---------------------------|--------------------------|-------------------------|--------------------------|--------------------------|--------------------------|--------------------------|
|                                                                                                            | 1,68%                       | 1,19%                     | 0,40%                    | 1,40%                   | 18,34%                   | 27,61%                   | 47,38%                   | 2,00%                    |
| <b>FB Shrub plantations</b>                                                                                | 40 393<br>96,51%            | 140<br>0,34%              | 350<br>0,84%             | 418<br>1,00%            | 143<br>0,34%             | 61<br>0,15%              | 51<br>0,12%              | 296<br>0,71%             |
| <b>G1 Broadleaved deciduous woodland</b>                                                                   | 3 670<br>14,26%             | 350<br>1,36%              | 286<br>1,11%             | 2 893<br>11,24%         | 2 852<br>11,08%          | 7 983<br>31,01%          | 7.392<br>28,72%          | 316<br>1,23%             |
| <b>G2 Broadleaved evergreen woodland</b>                                                                   | 76 506<br>11,15%            | 256 184<br>37,35%         | 117 008<br>17,06%        | 24 914<br>3,63%         | 124 128<br>18,09%        | 45 511<br>6,63%          | 25.674<br>3,74%          | 16 057<br>2,34%          |
| <b>G3 Coniferous woodland</b>                                                                              | 748<br>0,69%                | 557<br>0,51%              | 411<br>0,38%             | 18 142<br>16,77%        | 1 204<br>1,11%           | 10 673<br>9,86%          | 73.430<br>67,87%         | 3 032<br>2,80%           |
| <b>G4 Mixed deciduous and coniferous woodland</b>                                                          | 1 488<br>2,14%              | 14 552<br>20,96%          | 244<br>0,35%             | 17 309<br>24,93%        | 3 427<br>4,94%           | 10 702<br>15,41%         | 19.716<br>28,39%         | 2 000<br>2,88%           |
| <b>G5 Lines of trees, small anthropogenic woodlands, recently felled woodland, early stage and coppice</b> | 1 641<br>0,69%              | 10 291<br>4,34%           | 126<br>0,05%             | 1 513<br>0,64%          | 865<br>0,37%             | 4 795<br>2,02%           | 548<br>0,23%             | 217 098<br>91,65%        |
| <b>H3 Inland cliffs, rock pavements and outcrops</b>                                                       | 16<br>1,20%                 | 17<br>1,25%               | 1<br>0,05%               | 1<br>0,07%              | 9<br>0,67%               | 12<br>0,90%              | 9<br>0,67%               | 1 260<br>95,18%          |
| <b>H5 Miscellaneous inland habitats with very sparse or no vegetation</b>                                  | 307<br>3,12%                | 848<br>8,61%              | 15<br>0,16%              | 94<br>0,96%             | 594<br>6,03%             | 1 912<br>19,41%          | 481<br>4,88%             | 5 599<br>56,83%          |
| <b>I1 Arable land and market gardens</b>                                                                   | 618 409<br>93,67%           | 8 224<br>1,25%            | 9 488<br>1,44%           | 2 303<br>0,35%          | 12 529<br>1,90%          | 5 040<br>0,76%           | 656<br>0,10%             | 3 556<br>0,54%           |
| <b>J2 Low density buildings</b>                                                                            | 729<br>91,28%               | 31<br>3,86%               | 1<br>0,17%               | 2<br>0,29%              | 0,2<br>0,02%             | 33<br>4,19%              | 1<br>0,18%               | 0,1<br>0,01%             |
| <b>X07 Intensively farmed crops interspersed with strips of natural and/or seminatural vegetation</b>      | 3 813<br>90,42%             | 12<br>0,28%               | 15<br>0,36%              | 26<br>0,62%             | 306<br>7,24%             | 19<br>0,46%              | 23<br>0,54%              | 3<br>0,08%               |
| <b>Total</b>                                                                                               | <b>1 192 584<br/>39,28%</b> | <b>757 612<br/>24,96%</b> | <b>140 406<br/>4,63%</b> | <b>83 947<br/>2,77%</b> | <b>212 121<br/>6,99%</b> | <b>164 258<br/>5,41%</b> | <b>194.054<br/>6,39%</b> | <b>290 791<br/>9,58%</b> |

| EUNIS class                                                      | Ecological Value of Plant Communities Score |                  |                   |                   |                 | Total           | % Study Area |
|------------------------------------------------------------------|---------------------------------------------|------------------|-------------------|-------------------|-----------------|-----------------|--------------|
|                                                                  | 1                                           | 2                | 3                 | 4                 | 5               |                 |              |
| B1 Coastal dunes and sandy shores                                | 0<br>0%                                     | 0<br>0,00%       | 0<br>0,00%        | 2 715<br>100,00%  | 0<br>0,00%      | 2 715<br>100%   | 0,09%        |
| B1.6 Coastal dune scrub                                          | 0<br>0%                                     | 0<br>0,00%       | 0<br>0,00%        | 582<br>45,62%     | 694<br>54,38%   | 1 276<br>100%   | 0,04%        |
| B3 Rock cliffs, ledges and shores, including the supralittoral   | 0<br>0%                                     | 0<br>0,00%       | 0<br>0,00%        | 0<br>0,00%        | 114<br>100,00%  | 114<br>100%     | <0,005%      |
| E1 Dry grasslands                                                | 0<br>0%                                     | 66 365<br>15,19% | 369 114<br>84,51% | 1 295<br>0,30%    | 0<br>0,00%      | 436 775<br>100% | 14,39%       |
| E3 Seasonally wet and wet grasslands                             | 0<br>0%                                     | 0<br>0,00%       | 3 283<br>100,00%  | 0<br>0,00%        | 0<br>0,00%      | 3 283<br>100%   | 0,11%        |
| E7.3 Dehesa                                                      | 0<br>0%                                     | 4 961<br>0,80%   | 597 007<br>96,01% | 19 855<br>3,19%   | 0<br>0,00%      | 621 823<br>100% | 20,48%       |
| F3.1 Temperate thickets and scrub                                | 0<br>0%                                     | 711<br>52,60%    | 633<br>46,83%     | 8<br>0,57%        | 0<br>0,00%      | 1 352<br>100%   | 0,04%        |
| F4.2 Dry heaths                                                  | 0<br>0%                                     | 21 390<br>50,69% | 20 806<br>49,31%  | 0<br>0,00%        | 0<br>0,00%      | 42 196<br>100%  | 1,39%        |
| F5 Maquis, arborescent matorral and thermo-Mediterranean brushes | 0<br>0%                                     | 0<br>0,00%       | 1 052<br>45,10%   | 1 281<br>54,90%   | 0<br>0,00%      | 2 334<br>100%   | 0,08%        |
| F5.2 Maquis                                                      | 0<br>0%                                     | 0<br>0,00%       | 35 107<br>96,48%  | 1 221<br>3,36%    | 58<br>0,16%     | 36 386<br>100%  | 1,20%        |
| F5.5 Thermo-Mediterranean scrub                                  | 0<br>0%                                     | 0<br>0,00%       | 20 270<br>89,75%  | 2 315<br>10,25%   | 0<br>0,00%      | 22 585<br>100%  | 0,74%        |
| F6.1 Western garrigues                                           | 0<br>0%                                     | 10 036<br>48,15% | 10 544<br>50,58%  | 264<br>1,27%      | 0<br>0,00%      | 20 844<br>100%  | 0,69%        |
| FB.4 Vineyards                                                   | 41 853<br>100%                              | 0<br>0,00%       | 0<br>0,00%        | 0<br>0,00%        | 0<br>0,00%      | 41 853<br>100%  | 1,38%        |
| G1 Broadleaved deciduous woodland                                | 0<br>0%                                     | 0<br>0,00%       | 544<br>3,06%      | 17 114<br>96,15%  | 141<br>0,79%    | 17 800<br>100%  | 0,59%        |
| G1.772 Portuguese [Quercus faginea] forests                      | 0<br>0%                                     | 0<br>0,00%       | 0<br>0,00%        | 204<br>39,26%     | 315<br>60,74%   | 519<br>100%     | 0,02%        |
| G1.7B [Quercus pyrenaica] woodland                               | 0<br>0%                                     | 0<br>0,00%       | 0<br>0,00%        | 1 177<br>34,19%   | 2 266<br>65,81% | 3 443<br>100%   | 0,11%        |
| G1.7D [Castanea sativa] woodland                                 | 0<br>0%                                     | 0<br>0,00%       | 924<br>100%       | 0<br>0,00%        | 0<br>0,00%      | 924<br>100%     | 0,03%        |
| G1.D1 [Castanea sativa] plantations                              | 203<br>100%                                 | 0<br>0,00%       | 0<br>0,00%        | 0<br>0,00%        | 0<br>0,00%      | 203<br>100%     | 0,01%        |
| G1.D3 [Prunus amygdalus] groves                                  | 39<br>100%                                  | 0<br>0,00%       | 0<br>0,00%        | 0<br>0,00%        | 0<br>0,00%      | 39<br>100%      | <0,005%      |
| G1.D4 Fruit orchards                                             | 2 255<br>100%                               | 0<br>0,00%       | 0<br>0,00%        | 0<br>0,00%        | 0<br>0,00%      | 2 255<br>100%   | 0,07%        |
| G1.D5 Other high-stem orchards                                   | 559<br>100%                                 | 0<br>0,00%       | 0<br>0,00%        | 0<br>0,00%        | 0<br>0,00%      | 559<br>100%     | 0,02%        |
| G2.1 Mediterranean evergreen [Quercus] woodland                  | 0<br>0%                                     | 0<br>0,00%       | 0<br>0,00%        | 2<br>9,91%        | 17<br>90,09%    | 19<br>100%      | <0,005%      |
| G2.112 Southwestern Iberian [Quercus suber] forests              | 0<br>0%                                     | 0<br>0,00%       | 0<br>0,00%        | 238 006<br>97,16% | 6 964<br>2,84%  | 244 970<br>100% | 8,07%        |
| G2.124 [Quercus rotundifolia] woodland                           | 0<br>0%                                     | 0<br>0,00%       | 0<br>0,00%        | 139 634<br>98,47% | 2 175<br>1,53%  | 141 809<br>100% | 4,67%        |
| G2.81 [Eucalyptus] plantations                                   | 132 293<br>100%                             | 0<br>0,00%       | 0<br>0,00%        | 0<br>0,00%        | 0<br>0,00%      | 132 293<br>100% | 4,36%        |
| G2.83 Other evergreen broadleaved tree plantations               | 268<br>100%                                 | 0<br>0,00%       | 0<br>0,00%        | 0<br>0,00%        | 0<br>0,00%      | 268<br>100%     | 0,01%        |
| G2.91 [Olea europaea] groves                                     | 126 981<br>76,86%                           | 0<br>0,00%       | 38 222<br>23,14%  | 0<br>0,00%        | 0<br>0,00%      | 165 203<br>100% | 5,44%        |
| G2.92 Citrus orchards                                            | 1 465<br>100%                               | 0<br>0,00%       | 0<br>0,00%        | 0<br>0,00%        | 0<br>0,00%      | 1 465<br>100%   | 0,05%        |
| G3.714 Iberian [Pinus pinaster ssp. atlantica] forests           | 0<br>0%                                     | 0<br>0,00%       | 22 809<br>100%    | 0<br>0,00%        | 0<br>0,00%      | 22 809<br>100%  | 0,75%        |

| EUNIS class                                                                                          | Ecological Value of Plant Communities Score |                          |                             |                           |                         | Total                     | % Study Area |
|------------------------------------------------------------------------------------------------------|---------------------------------------------|--------------------------|-----------------------------|---------------------------|-------------------------|---------------------------|--------------|
|                                                                                                      | 1                                           | 2                        | 3                           | 4                         | 5                       |                           |              |
| G3.7312 Lusitanian stone pine forests                                                                | 0<br>0%                                     | 0<br>0,00%               | 26 181<br>100%              | 0<br>0,00%                | 0<br>0,00%              | 26 181<br>100%            | 0,86%        |
| G3.F2 Exotic conifer plantations                                                                     | 3 994<br>100%                               | 0<br>0,00%               | 0<br>0,00%                  | 0<br>0,00%                | 0<br>0,00%              | 3 994<br>100%             | 0,13%        |
| G3.F22 Exotic pine plantations                                                                       | 55 217<br>100%                              | 0<br>0,00%               | 0<br>0,00%                  | 0<br>0,00%                | 0<br>0,00%              | 55 217<br>100%            | 1,82%        |
| G4.B Mixed Mediterranean [Pinus] - thermophilous [Quercus] woodland                                  | 0<br>0%                                     | 0<br>0,00%               | 9 662<br>100%               | 0<br>0,00%                | 0<br>0,00%              | 9 662<br>100%             | 0,32%        |
| G4.F Mixed forestry plantations                                                                      | 59 777<br>100%                              | 0<br>0,00%               | 0<br>0,00%                  | 0<br>0,00%                | 0<br>0,00%              | 59 777<br>100%            | 1,97%        |
| G5.7 Coppice and early-stage plantations                                                             | 220 337<br>100%                             | 0<br>0,00%               | 0<br>0,00%                  | 0<br>0,00%                | 0<br>0,00%              | 220 337<br>100%           | 7,26%        |
| G5.8 Recently felled areas                                                                           | 16 551<br>100%                              | 0<br>0,00%               | 0<br>0,00%                  | 0<br>0,00%                | 0<br>0,00%              | 16 551<br>100%            | 0,55%        |
| H3 Inland cliffs, rock pavements and outcrops                                                        | 0<br>0%                                     | 0<br>0,00%               | 1 324<br>100%               | 0<br>0,00%                | 0<br>0,00%              | 1 324<br>100%             | 0,04%        |
| H5.3 Sparsely- or un-vegetated habitats on mineral substrates not resulting from recent ice activity | 0<br>0%                                     | 4 335<br>76,10%          | 1 362<br>23,90%             | 0<br>0,00%                | 0<br>0,00%              | 5 697<br>100%             | 0,19%        |
| H5.5 Burnt areas with very sparse or no vegetation                                                   | 2 100<br>100%                               | 0<br>0,00%               | 0<br>0,00%                  | 0<br>0,00%                | 0<br>0,00%              | 2 100<br>100%             | 0,07%        |
| H5.61 Unsurfaced pathways                                                                            | 2 057<br>100%                               | 0<br>0,00%               | 0<br>0,00%                  | 0<br>0,00%                | 0<br>0,00%              | 2 057<br>100%             | 0,07%        |
| I1 Arable land and market gardens                                                                    | 149 950<br>100%                             | 0<br>0,00%               | 0<br>0,00%                  | 0<br>0,00%                | 0<br>0,00%              | 149 950<br>100%           | 4,94%        |
| I1.22 Small-scale market gardens and horticulture, including allotments                              | 34 815<br>100%                              | 0<br>0,00%               | 0<br>0,00%                  | 0<br>0,00%                | 0<br>0,00%              | 34 815<br>100%            | 1,15%        |
| I1.3 Arable land with unmixed crops grown by low-intensity agricultural methods                      | 455 231<br>100%                             | 0<br>0,00%               | 0<br>0,00%                  | 0<br>0,00%                | 0<br>0,00%              | 455 231<br>100%           | 14,99%       |
| I1.4 Inundated or inundatable croplands, including rice fields                                       | 20 221<br>100%                              | 0<br>0,00%               | 0<br>0,00%                  | 0<br>0,00%                | 0<br>0,00%              | 20 221<br>100%            | 0,67%        |
| J2.43 Greenhouses                                                                                    | 799<br>100%                                 | 0<br>0,00%               | 0<br>0,00%                  | 0<br>0,00%                | 0<br>0,00%              | 799<br>100%               | 0,03%        |
| X07 Intensively-farmed crops interspersed with strips of natural and/or semi-natural vegetation      | 4 217<br>100%                               | 0<br>0,00%               | 0<br>0,00%                  | 0<br>0,00%                | 0<br>0,00%              | 4 217<br>100%             | 0,14%        |
| <b>Total</b>                                                                                         | <b>1 331 183<br/>43,84%</b>                 | <b>107 799<br/>3,55%</b> | <b>1 158 843<br/>38,17%</b> | <b>425 674<br/>14,02%</b> | <b>12 745<br/>0,42%</b> | <b>3 036 244<br/>100%</b> | <b>100%</b>  |

Blanks are 0 (zero)

| EUNIS class                                                    | Plant Diversity Score |         |                   |                   |                 |                 | Total           | % Study Area |
|----------------------------------------------------------------|-----------------------|---------|-------------------|-------------------|-----------------|-----------------|-----------------|--------------|
|                                                                | 0                     | 1       | 2                 | 3                 | 4               | 5               |                 |              |
| B1 Coastal dunes and sandy shores                              | 0<br>0%               | 0<br>0% | 1 692<br>62,33%   | 0<br>0%           | 1 023<br>37,67% | 0<br>0%         | 2 715<br>100%   | 0,09%        |
| B1.6 Coastal dune scrub                                        | 0<br>0%               | 0<br>0% | 638<br>50,01%     | 0<br>0%           | 638<br>49,99%   | 0<br>0%         | 1 276<br>100%   | 0,04%        |
| B3 Rock cliffs, ledges and shores, including the supralittoral | 0<br>0%               | 0<br>0% | 114<br>100%       | 0<br>0%           | 0<br>0%         | 0<br>0%         | 114<br>100%     | <0,005%      |
| E1 Dry grasslands                                              | 0<br>0%               | 0<br>0% | 234 533<br>53,70% | 165 038<br>37,79% | 12 048<br>2,76% | 25 156<br>5,76% | 436 775<br>100% | 14,39%       |
| E3 Seasonally wet and wet grasslands                           | 0<br>0%               | 0<br>0% | 0<br>0%           | 0<br>0%           | 3 283<br>100%   | 0<br>0%         | 3 283<br>100%   | 0,11%        |

| EUNIS class                                                      | Plant Diversity Score |                   |                   |                   |                   |         | Total           | % Study Area |
|------------------------------------------------------------------|-----------------------|-------------------|-------------------|-------------------|-------------------|---------|-----------------|--------------|
|                                                                  | 0                     | 1                 | 2                 | 3                 | 4                 | 5       |                 |              |
| E7.3 Dehesa                                                      | 0<br>0%               | 66 144<br>10,64%  | 0<br>0%           | 0<br>0%           | 555 679<br>89,36% | 0<br>0% | 621 823<br>100% | 20,48%       |
| F3.1 Temperate thickets and scrub                                | 0<br>0%               | 0<br>0%           | 0<br>0%           | 1 352<br>100%     | 0<br>0%           | 0<br>0% | 1 352<br>100%   | 0,04%        |
| F4.2 Dry heaths                                                  | 0<br>0%               | 0<br>0%           | 42 196<br>100%    | 0<br>0%           | 0<br>0%           | 0<br>0% | 42 196<br>100%  | 1,39%        |
| F5 Maquis, arborescent matorral and thermo-Mediterranean brushes | 0<br>0%               | 0<br>0%           | 623<br>26,72%     | 206<br>8,84%      | 1 504<br>64,44%   | 0<br>0% | 2 334<br>100%   | 0,08%        |
| F5.2 Maquis                                                      | 0<br>0%               | 0<br>0%           | 3 167<br>8,70%    | 4 875<br>13,40%   | 28 344<br>77,90%  | 0<br>0% | 36 386<br>100%  | 1,20%        |
| F5.5 Thermo-Mediterranean scrub                                  | 0<br>0%               | 8 973<br>39,73%   | 12 299<br>54,46%  | 1 313<br>5,81%    | 0<br>0%           | 0<br>0% | 22 585<br>100%  | 0,74%        |
| F6.1 Western garrigues                                           | 0<br>0%               | 14<br>0,07%       | 15 004<br>71,98%  | 3 767<br>18,07%   | 2 059<br>9,88%    | 0<br>0% | 20 844<br>100%  | 0,69%        |
| FB.4 Vineyards                                                   | 0<br>0%               | 41 853<br>100%    | 0<br>0%           | 0<br>0%           | 0<br>0%           | 0<br>0% | 41 853<br>100%  | 1,38%        |
| G1 Broadleaved deciduous woodland                                | 0<br>0%               | 0<br>0%           | 11 521<br>64,73%  | 6 279<br>35,27%   | 0<br>0%           | 0<br>0% | 17 800<br>100%  | 0,59%        |
| G1.772 Portuguese [Quercus faginea] forests                      | 0<br>0%               | 0<br>0%           | 352<br>67,83%     | 107<br>20,59%     | 60<br>11,59%      | 0<br>0% | 519<br>100%     | 0,02%        |
| G1.7B [Quercus pyrenaica] woodland                               | 0<br>0%               | 0<br>0%           | 39<br>1,13%       | 3 404<br>98,87%   | 0<br>0%           | 0<br>0% | 3 443<br>100%   | 0,11%        |
| G1.7D [Castanea sativa] woodland                                 | 0<br>0%               | 0<br>0%           | 0<br>0%           | 924<br>100%       | 0<br>0%           | 0<br>0% | 924<br>100%     | 0,03%        |
| G1.D1 [Castanea sativa] plantations                              | 0<br>0%               | 203<br>100%       | 0<br>0%           | 0<br>0%           | 0<br>0%           | 0<br>0% | 203<br>100%     | 0,01%        |
| G1.D3 [Prunus amygdalus] groves                                  | 0<br>0%               | 39<br>100%        | 0<br>0%           | 0<br>0%           | 0<br>0%           | 0<br>0% | 39<br>100%      | <0,005%      |
| G1.D4 Fruit orchards                                             | 0<br>0%               | 2 255<br>100%     | 0<br>0%           | 0<br>0%           | 0<br>0%           | 0<br>0% | 2 255<br>100%   | 0,07%        |
| G1.D5 Other high-stem orchards                                   | 0<br>0%               | 559<br>100%       | 0<br>0%           | 0<br>0%           | 0<br>0%           | 0<br>0% | 559<br>100%     | 0,02%        |
| G2.1 Mediterranean evergreen [Quercus] woodland                  | 0<br>0%               | 0<br>0%           | 19<br>100%        | 0<br>0%           | 0<br>0%           | 0<br>0% | 19<br>100%      | <0,005%      |
| G2.112 Southwestern Iberian [Quercus suber] forests              | 0<br>0%               | 0<br>0%           | 27 250<br>11,12%  | 117 815<br>48,09% | 99 905<br>40,78%  | 0<br>0% | 244 970<br>100% | 8,07%        |
| G2.124 [Quercus rotundifolia] woodland                           | 0<br>0%               | 0<br>0%           | 116 042<br>81,83% | 11 262<br>7,94%   | 14 505<br>10,23%  | 0<br>0% | 141 809<br>100% | 4,67%        |
| G2.81 [Eucalyptus] plantations                                   | 0<br>0%               | 132 293<br>100%   | 0<br>0%           | 0<br>0%           | 0<br>0%           | 0<br>0% | 132 293<br>100% | 4,36%        |
| G2.83 Other evergreen broadleaved tree plantations               | 0<br>0%               | 268<br>100%       | 0<br>0%           | 0<br>0%           | 0<br>0%           | 0<br>0% | 268<br>100%     | 0,01%        |
| G2.91 [Olea europaea] groves                                     | 0<br>0%               | 126 978<br>76,86% | 0<br>0%           | 38 225<br>23,14%  | 0<br>0%           | 0<br>0% | 165 203<br>100% | 5,44%        |
| G2.92 Citrus orchards                                            | 0<br>0%               | 1 465<br>100%     | 0<br>0%           | 0<br>0%           | 0<br>0%           | 0<br>0% | 1 465<br>100%   | 0,05%        |
| G3.714 Iberian [Pinus pinaster ssp. atlantica] forests           | 0<br>0%               | 0<br>0%           | 1 931<br>8,47%    | 0<br>0%           | 20 877<br>91,53%  | 0<br>0% | 22 809<br>100%  | 0,75%        |
| G3.7312 Lusitanian stone pine forests                            | 0<br>0%               | 0<br>0%           | 489<br>1,87%      | 0<br>0%           | 25 692<br>98,13%  | 0<br>0% | 26 181<br>100%  | 0,86%        |
| G3.F2 Exotic conifer plantations                                 | 0<br>0%               | 3 994<br>100%     | 0<br>0%           | 0<br>0%           | 0<br>0%           | 0<br>0% | 3 994<br>100%   | 0,13%        |
| G3.F22 Exotic pine plantations                                   | 0<br>0%               | 55 217<br>100%    | 0<br>0%           | 0<br>0%           | 0<br>0%           | 0<br>0% | 55 217<br>100%  | 1,82%        |
|                                                                  | 0                     | 0                 | 188               | 0                 | 9 474             | 0       | 9 662           |              |

| EUNIS class                                                                                                 | Plant Diversity Score |                  |               |         |         |         | Total                   | % Study Area  |
|-------------------------------------------------------------------------------------------------------------|-----------------------|------------------|---------------|---------|---------|---------|-------------------------|---------------|
|                                                                                                             | 0                     | 1                | 2             | 3       | 4       | 5       |                         |               |
| <b>G4.B Mixed mediterranean [Pinus] - thermophilous [Quercus] woodland</b>                                  | 0%                    | 0%               | 1,95%         | 0%      | 98,05%  | 0%      | <b>100%</b>             | <b>0,32%</b>  |
| <b>G4.F Mixed forestry plantations</b>                                                                      | 80<br>0,13%           | 59 697<br>99,87% | 0<br>0%       | 0<br>0% | 0<br>0% | 0<br>0% | <b>59 777<br/>100%</b>  | <b>1,97%</b>  |
| <b>G5.7 Coppice and early-stage plantations</b>                                                             | 220337<br>100%        | 0<br>0%          | 0<br>0%       | 0<br>0% | 0<br>0% | 0<br>0% | <b>220 337<br/>100%</b> | <b>7,26%</b>  |
| <b>G5.8 Recently felled areas</b>                                                                           | 16 551<br>100%        | 0<br>0%          | 0<br>0%       | 0<br>0% | 0<br>0% | 0<br>0% | <b>16 551<br/>100%</b>  | <b>0,55%</b>  |
| <b>H3 Inland cliffs, rock pavements and outcrops</b>                                                        | 0<br>0%               | 0<br>0%          | 1 324<br>100% | 0<br>0% | 0<br>0% | 0<br>0% | <b>1 324<br/>100%</b>   | <b>0,04%</b>  |
| <b>H5.3 Sparsely- or un-vegetated habitats on mineral substrates not resulting from recent ice activity</b> | 0<br>0%               | 5 208<br>91,42%  | 489<br>8,58%  | 0<br>0% | 0<br>0% | 0<br>0% | <b>5 697<br/>100%</b>   | <b>0,19%</b>  |
| <b>H5.5 Burnt areas with very sparse or no vegetation</b>                                                   | 2 100<br>100%         | 0<br>0%          | 0<br>0%       | 0<br>0% | 0<br>0% | 0<br>0% | <b>2 100<br/>100%</b>   | <b>0,07%</b>  |
| <b>H5.61 Unsurfaced pathways</b>                                                                            | 2 057<br>100%         | 0<br>0%          | 0<br>0%       | 0<br>0% | 0<br>0% | 0<br>0% | <b>2 057<br/>100%</b>   | <b>0,07%</b>  |
| <b>I1 Arable land and market gardens</b>                                                                    | 0<br>0%               | 149 950<br>100%  | 0<br>0%       | 0<br>0% | 0<br>0% | 0<br>0% | <b>149 950<br/>100%</b> | <b>4,94%</b>  |
| <b>I1.22 Small-scale market gardens and horticulture, including allotments</b>                              | 0<br>0%               | 34 815<br>100%   | 0<br>0%       | 0<br>0% | 0<br>0% | 0<br>0% | <b>34 815<br/>100%</b>  | <b>1,15%</b>  |
| <b>I1.3 Arable land with unmixed crops grown by low-intensity agricultural methods</b>                      | 0<br>0%               | 455 231<br>100%  | 0<br>0%       | 0<br>0% | 0<br>0% | 0<br>0% | <b>455 231<br/>100%</b> | <b>14,99%</b> |
| <b>I1.4 Inundated or inundatable croplands, including rice fields</b>                                       | 0<br>0%               | 20 221<br>100%   | 0<br>0%       | 0<br>0% | 0<br>0% | 0<br>0% | <b>20 221<br/>100%</b>  | <b>0,67%</b>  |
| <b>J2.43 Greenhouses</b>                                                                                    | 799<br>100%           | 0<br>0%          | 0<br>0%       | 0<br>0% | 0<br>0% | 0<br>0% | <b>799<br/>100%</b>     | <b>0,03%</b>  |
| <b>X07 Intensively-farmed crops interspersed with strips of natural and/or semi-natural vegetation</b>      | 0<br>0%               | 4 217<br>100%    | 0<br>0%       | 0<br>0% | 0<br>0% | 0<br>0% | <b>4 217<br/>100%</b>   | <b>0,14%</b>  |

| EUNIS class                                                             | Bird Diversity Score |                |                |                |                |               | Total                   |
|-------------------------------------------------------------------------|----------------------|----------------|----------------|----------------|----------------|---------------|-------------------------|
|                                                                         | 0                    | 1              | 2              | 3              | 4              | 5             |                         |
| <b>B1 Coastal dunes and sandy shores</b>                                | 0<br>0               | 52<br>1%       | 311<br>7%      | 2 022<br>45%   | 1 244<br>28%   | 829<br>19%    | <b>4 458<br/>100%</b>   |
| <b>E1 Dry grasslands</b>                                                | 1 089<br>0,3%        | 79 626<br>18%  | 108 605<br>25% | 102 332<br>24% | 90 720<br>21%  | 51 425<br>12% | <b>433 797<br/>100%</b> |
| <b>E3 Seasonally wet and wet grasslands</b>                             | 0<br>0%              | 622<br>21%     | 518<br>17%     | 674<br>22%     | 829<br>28%     | 363<br>12%    | <b>3 007<br/>100%</b>   |
| <b>E7 Sparsely wooded grasslands</b>                                    | 5 184<br>1%          | 123 327<br>20% | 180 766<br>29% | 168 169<br>27% | 106 583<br>17% | 38 465<br>6%  | <b>622 495<br/>100%</b> |
| <b>F3 Temperate and Mediterranean-montane scrub</b>                     | 0<br>0%              | 0<br>0%        | 52<br>4%       | 259<br>19%     | 259<br>19%     | 778<br>58%    | <b>1 348<br/>100%</b>   |
| <b>F4 Temperate shrub heathland</b>                                     | 0<br>0%              | 156<br>0,4%    | 1 503<br>3%    | 5 651<br>13%   | 14 982<br>35%  | 20 892<br>48% | <b>43 183<br/>100%</b>  |
| <b>F5 Maquis, arborescent matorral and thermo-Mediterranean brushes</b> | 104<br>0,2%          | 8 709<br>14%   | 14 878<br>25%  | 14 982<br>25%  | 14 826<br>25%  | 6 791<br>11%  | <b>60 290<br/>100%</b>  |
| <b>F6 Garrigue</b>                                                      | 0                    | 1 659          | 3 681          | 4 666          | 5 132          | 5 340         | <b>20 477</b>           |

| EUNIS class                                                                                                  | Bird Diversity Score |                  |                  |                  |                  |                  | Total           |
|--------------------------------------------------------------------------------------------------------------|----------------------|------------------|------------------|------------------|------------------|------------------|-----------------|
|                                                                                                              | 0                    | 1                | 2                | 3                | 4                | 5                |                 |
|                                                                                                              | 0%                   | 8%               | 18%              | 23%              | 25%              | 26%              | 100%            |
| FB Shrub plantations                                                                                         | 363<br>1%            | 9 124<br>22%     | 7 258<br>17%     | 6 117<br>14%     | 10 264<br>24%    | 9 176<br>22%     | 42 301<br>100%  |
| G1 Broadleaved deciduous woodland                                                                            | 0<br>0%              | 1 503<br>6%      | 2 748<br>11%     | 6 791<br>26%     | 6 013<br>23%     | 9 020<br>35%     | 26 076<br>100%  |
| G2 Broadleaved evergreen woodland                                                                            | 4 977<br>1%          | 89 839<br>13%    | 149 558<br>22%   | 173 975<br>25%   | 168 013<br>24%   | 100 518<br>15%   | 686 880<br>100% |
| G3 Coniferous woodland                                                                                       | 259<br>0,2%          | 8 968<br>8%      | 24 209<br>22%    | 29 393<br>27%    | 29 652<br>28%    | 15 293<br>14%    | 107 775<br>100% |
| G4 Mixed deciduous and coniferous woodland                                                                   | 0<br>0%              | 3 473<br>5%      | 14 100<br>20%    | 20 995<br>29%    | 19 958<br>28%    | 12 701<br>18%    | 71 228<br>100%  |
| G5 Lines of trees, small anthropogenic woodlands, recently felled woodland, early-stage woodland and coppice | 2 903<br>1%          | 49 974<br>21%    | 54 432<br>23%    | 53 395<br>23%    | 48 315<br>21%    | 24 676<br>11%    | 233 695<br>100% |
| H3 Inland cliffs, rock pavements and outcrops                                                                | 0<br>0%              | 0<br>0%          | 311<br>19%       | 104<br>6%        | 467<br>29%       | 726<br>45%       | 1 607<br>100%   |
| H5 Miscellaneous inland habitats with very sparse or no vegetation                                           | 0<br>0%              | 1 607<br>16%     | 1 452<br>15%     | 2 385<br>24%     | 1 763<br>18%     | 2 540<br>26%     | 9 746<br>100%   |
| I1 Arable land and market gardens                                                                            | 10 264<br>2%         | 208 449<br>31%   | 137 894<br>21%   | 116 640<br>18%   | 114 774<br>17%   | 77 501<br>12%    | 665 522<br>100% |
| J2 Low density buildings                                                                                     | 0<br>0%              | 104<br>11%       | 52<br>5%         | 363<br>37%       | 311<br>32%       | 156<br>16%       | 985<br>100%     |
| X07 Intensively-farmed crops interspersed with strips of natural and/or semi-natural vegetation              | 0<br>0%              | 933<br>24%       | 311<br>8%        | 778<br>20%       | 674<br>17%       | 1 192<br>31%     | 3 888<br>100%   |
| Total                                                                                                        | 25.142<br>0,8%       | 588 125<br>19,4% | 702 639<br>23,1% | 709 690<br>23,4% | 634 781<br>20,9% | 378 380<br>12,5% | 3 038 7<br>100% |

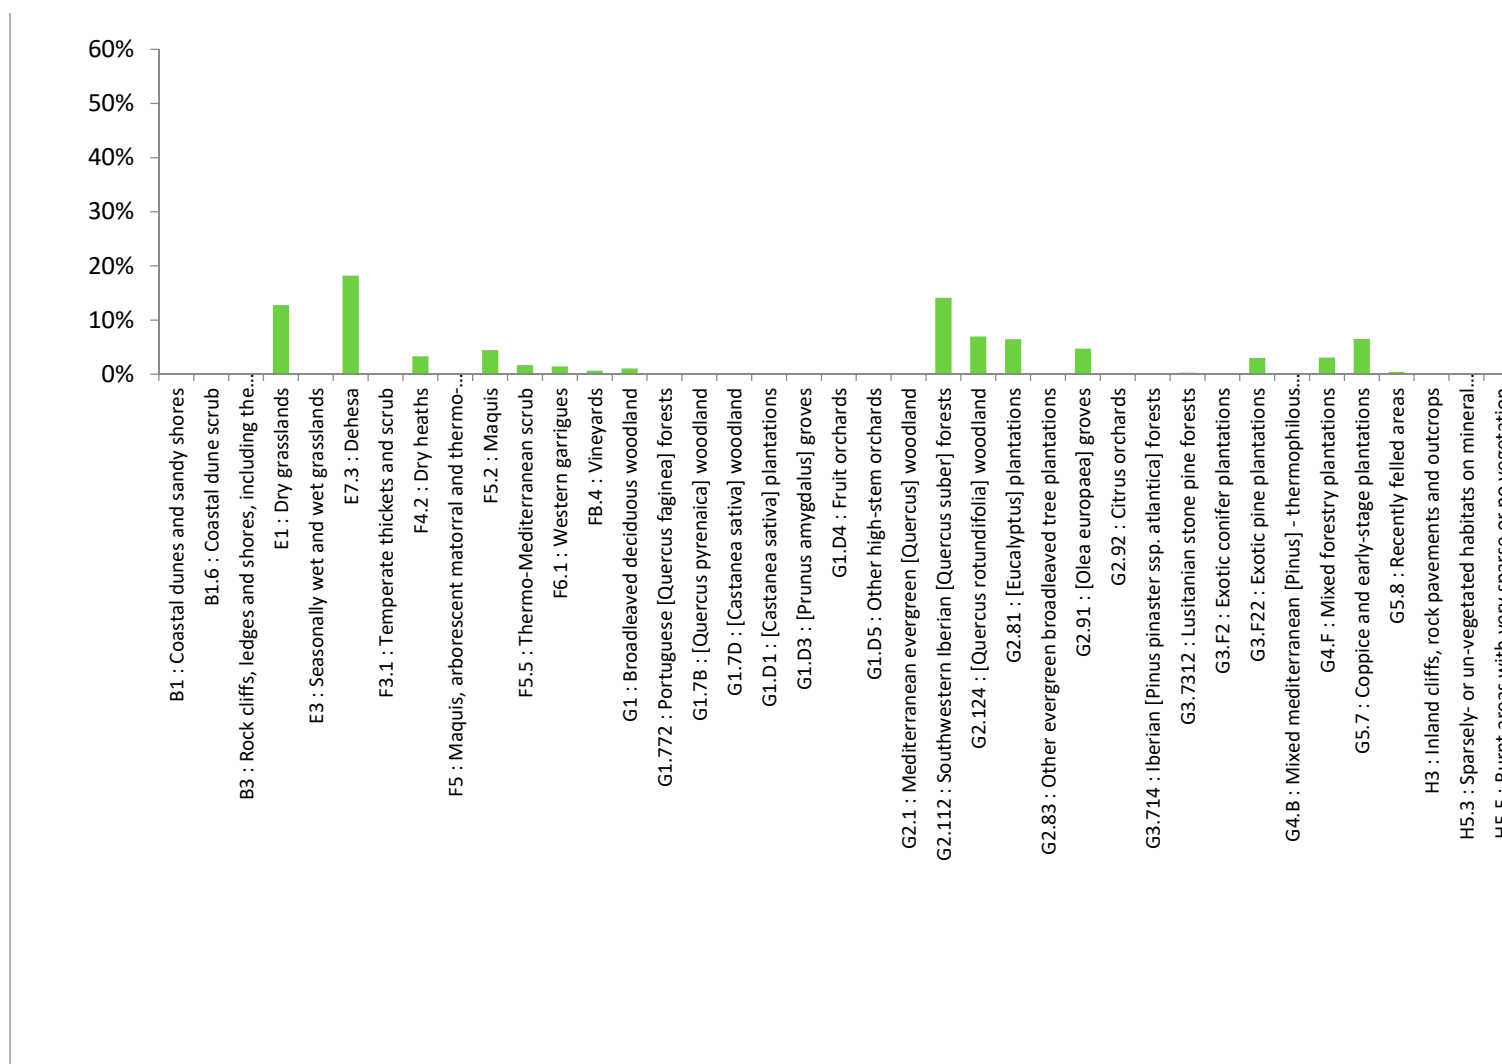

% Area (of total study area) of high supply of Control of Erosion Rates (over 50t/ha) per EUNIS class



|                                                                                                             | Carbon Sequestration (tC/ha/ano) |                  |                   |                     |                   |                  |                |                |
|-------------------------------------------------------------------------------------------------------------|----------------------------------|------------------|-------------------|---------------------|-------------------|------------------|----------------|----------------|
| EUNIS class                                                                                                 | < -4                             | -4 a -2          | -2 a -1           | -1 a 0              | 0 a 2             | 2 a 4            | 4 a 6          | >8             |
| B1 Coastal dunes and sandy shores                                                                           | 3<br>0,07%                       | 564<br>14,13%    | 78<br>1,97%       | 2 407<br>60,32%     | 370<br>9,26%      | 357<br>8,94%     | 1<br>0,03%     | 33<br>0,82%    |
| B3 Rock cliffs, ledges and shores, including the supralittoral                                              | 0<br>0,00%                       | 17<br>14,70%     | 0<br>0,00%        | 86<br>75,07%        | 1<br>1,28%        | 5<br>4,45%       | 0<br>0,00%     |                |
| E1 Dry grasslands                                                                                           | 920<br>0,21%                     | 29 814<br>6,83%  | 113 262<br>25,93% | 84 147<br>19,27%    | 197 681<br>45,26% | 3 589<br>0,82%   | 176<br>0,04%   | 43<br>0,01%    |
| E3 Seasonally wet and wet grasslands                                                                        | 14<br>0,43%                      | 624<br>19,21%    | 397<br>12,22%     | 505<br>15,55%       | 1 407<br>43,28%   | 208<br>6,41%     | 6<br>0,19%     | 3<br>0,08%     |
| E7 Sparsely wooded grasslands                                                                               | 2 803<br>0,45%                   | 17 488<br>2,81%  | 217 437<br>34,98% | 79 974<br>12,87%    | 255 891<br>41,17% | 17 066<br>2,75%  | 1 456<br>0,23% | 88<br>0,01%    |
| F3 Temperate and Mediterranean-montane scrub                                                                | 5<br>0,39%                       | 6<br>0,45%       | 16<br>1,21%       | 344<br>25,47%       | 562<br>41,54%     | 320<br>23,69%    | 2<br>0,11%     | 77<br>5,72%    |
| F4 Temperate shrub heathland                                                                                | 104<br>0,25%                     | 155<br>0,37%     | 407<br>0,96%      | 16 225<br>38,45%    | 15 786<br>37,41%  | 8 972<br>21,26%  | 22<br>0,05%    | 133<br>0,32%   |
| F5 Maquis, arborescent matorral and thermo-Mediterranean brushes                                            | 482<br>0,79%                     | 252<br>0,41%     | 756<br>1,23%      | 22 421<br>36,57%    | 20 756<br>33,86%  | 15 611<br>25,47% | 13<br>0,02%    | 356<br>0,58%   |
| F6 Garrigue                                                                                                 | 187<br>0,90%                     | 139<br>0,67%     | 236<br>1,14%      | 8 140<br>39,08%     | 6 365<br>30,56%   | 5 197<br>24,95%  | 5<br>0,03%     | 197<br>0,95%   |
| FB Shrub plantations                                                                                        | 123<br>0,29%                     | 573<br>1,37%     | 1 565<br>3,74%    | 22 924<br>54,77%    | 16 283<br>38,91%  | 82<br>0,20%      | 13<br>0,03%    | 1<br>0,00%     |
| G1 Broadleaved deciduous woodland                                                                           | 188<br>0,73%                     | 171<br>0,66%     | 320<br>1,24%      | 2 127<br>8,26%      | 10 347<br>40,20%  | 8 444<br>32,80%  | 2 139<br>8,31% | 1 765<br>6,86% |
| G2 Broadleaved evergreen woodland                                                                           | 5 689<br>0,83%                   | 43 999<br>6,41%  | 107 138<br>15,62% | 279 123<br>40,69%   | 231 613<br>33,76% | 2 162<br>0,32%   | 520<br>0,08%   | 88<br>0,01%    |
| G3 Coniferous woodland                                                                                      | 43<br>0,04%                      | 225<br>0,21%     | 22 228<br>20,54%  | 1 325<br>1,22%      | 15 399<br>14,23%  | 63 090<br>58,31% | 2 593<br>2,40% | 320<br>0,30%   |
| G4 Mixed deciduous and coniferous woodland                                                                  | 47<br>0,07%                      | 2 490<br>3,59%   | 3 606<br>5,19%    | 11 414<br>16,44%    | 21 373<br>30,78%  | 27 029<br>38,92% | 1 336<br>1,92% | 208<br>0,30%   |
| G5 Lines of trees, small anthropogenic woodlands, recently felled woodland, earlystage woodland and coppice | 216<br>0,09%                     | 4 485<br>1,89%   | 888<br>0,37%      | 3 421<br>1,44%      | 10 370<br>4,38%   | 439<br>0,19%     | 23<br>0,01%    | 11<br>0,00%    |
| H3 Inland cliffs, rock pavements and outcrops                                                               | 2<br>0,16%                       | 242<br>18,26%    | 148<br>11,22%     | 745<br>56,28%       | 142<br>10,72%     | 42<br>3,15%      | 0<br>0,00%     | 0<br>0,00%     |
| H5 Miscellaneous inland habitats with very sparse or no vegetation                                          | 1 615<br>16,39%                  | 2 064<br>20,95%  | 1 288<br>13,07%   | 1 862<br>18,90%     | 2 053<br>20,84%   | 678<br>6,88%     | 3<br>0,03%     | 4<br>0,04%     |
| I1 Arable land and market gardens                                                                           | 1 715<br>0,26%                   | 15 076<br>2,28%  | 59 230<br>8,97%   | 572 111<br>86,66%   | 4 513<br>0,68%    | 4 066<br>0,62%   | 158<br>0,02%   | 71<br>0,01%    |
| J2 Low density buildings                                                                                    | 0<br>0,00%                       | 33<br>4,14%      | 16<br>2,01%       | 742<br>92,89%       | 5<br>0,66%        | 2<br>0,25%       | 0<br>0,04%     | 0<br>0,00%     |
| X07 Intensivelyfarmed crops interspersed with strips of natural and/or seminatural vegetation               | 8<br>0,18%                       | 316<br>7,48%     | 620<br>14,71%     | 3.226<br>76,50%     | 24<br>0,58%       | 19<br>0,45%      | 0<br>0,00%     | 1<br>0,01%     |
| Total                                                                                                       | 14.162<br>0,47%                  | 118.734<br>3,91% | 529.638<br>17,45% | 1.113.268<br>36,67% | 810.941<br>26,71% | 157.377<br>5,18% | 8.467<br>0,28% | 3.398<br>0,11% |

| EUNIS class                                                                                                | Fiber Production (m³/ha/ano) |                     |                  |              |                   |                   |
|------------------------------------------------------------------------------------------------------------|------------------------------|---------------------|------------------|--------------|-------------------|-------------------|
|                                                                                                            | 0                            | 0,5                 | 2,9              | 4,9          | 5,6               | 9,4               |
| B1 Coastal dunes and sandy shores                                                                          | 3 945<br>98,86%              | 10<br>0,24%         | 1<br>0,02%       | 0<br>0%      | 33<br>0,84%       | 2<br>0,04%        |
| B3 Rock cliffs, ledges and shores, including the supralittoral                                             | 114<br>100%                  | 0<br>0%             | 0<br>0%          | 0<br>0%      | 0<br>0%           | 0<br>0%           |
| E1 Dry grasslands                                                                                          | 427 124<br>97,80%            | 8 063<br>1,85%      | 465<br>0,11%     | 3<br>0%      | 570<br>0,13%      | 501<br>0,11%      |
| E3 Seasonally wet and wet grasslands                                                                       | 3 115<br>95,85%              | 87<br>2,66%         | 19<br>0,59%      | 0<br>0%      | 16<br>0,50%       | 13<br>0,40%       |
| E7 Sparsely wooded grasslands                                                                              | 8 989<br>1,45%               | 586 584<br>94,38%   | 25 432<br>4,09%  | 1<br>0%      | 267<br>0,04%      | 252<br>0,04%      |
| F3 Temperate and Mediterranean montane scrub                                                               | 1 293<br>95,63%              | 24<br>1,78%         | 11<br>0,81%      | 0<br>0%      | 15<br>1,13%       | 9<br>0,66%        |
| F4 Temperate shrub heathland                                                                               | 40 907<br>96,95%             | 633<br>1,50%        | 108<br>0,26%     | 0<br>0%      | 197<br>0,47%      | 350<br>0,83%      |
| F5 Maquis, arborescent matorral and thermo Mediterranean brushes                                           | 60 219<br>98,23%             | 795<br>1,30%        | 68<br>0,11%      | 2<br>0%      | 59<br>0,10%       | 158<br>0,26%      |
| F6 Garrigue                                                                                                | 20 285<br>97,38%             | 357<br>1,71%        | 35<br>0,17%      | 0<br>0%      | 67<br>0,32%       | 88<br>0,42%       |
| FB Shrub plantations                                                                                       | 41 641<br>99,49%             | 102<br>0,24%        | 26<br>0,06%      | 1<br>0%      | 29<br>0,07%       | 53<br>0,13%       |
| G1 Broadleaved deciduous woodland                                                                          | 5 074<br>19,71%              | 443<br>1,72%        | 20 052<br>77,90% | 0<br>0%      | 78<br>0,30%       | 93<br>0,36%       |
| G2 Broadleaved evergreen woodland                                                                          | 172 863<br>25,20%            | 381 125<br>55,56%   | 1 152<br>0,17%   | 0<br>0%      | 830<br>0,12%      | 130 011<br>18,95% |
| G3 Coniferous woodland                                                                                     | 1 584<br>1,46%               | 818<br>0,76%        | 90<br>0,08%      | 137<br>0,13% | 105 205<br>97,23% | 365<br>0,34%      |
| G4 Mixed deciduous and coniferous woodland                                                                 | 1 383<br>1,99%               | 25 239<br>36,35%    | 4 157<br>5,99%   | 130<br>0,19% | 34 700<br>49,97%  | 3 830<br>5,52%    |
| G5 Lines of trees, small anthropogenic woodlands, recently felled woodland, earlstage woodland and coppice | 218 077<br>92,06%            | 17 848<br>7,53%     | 99<br>0,04%      | 2<br>0%      | 369<br>0,16%      | 483<br>0,20%      |
| H3 Inland cliffs, rock pavements and outcrops                                                              | 1 288<br>97,27%              | 22<br>1,64%         | 4<br>0,28%       | 0<br>0%      | 3<br>0,25%        | 7<br>0,56%        |
| H5 Miscellaneous inland habitats with very sparse or no vegetation                                         | 7 709<br>78,25%              | 1 967<br>19,97%     | 17<br>0,17%      | 0<br>0%      | 76<br>0,77%       | 83<br>0,84%       |
| I1 Arable land and market gardens                                                                          | 656 123<br>99,38%            | 2 852<br>0,43%      | 430<br>0,07%     | 2<br>0%      | 432<br>0,07%      | 368<br>0,06%      |
| J2 Low density buildings                                                                                   | 793<br>99,22%                | 4<br>0,52%          | 0<br>0%          | 0<br>0%      | 2<br>0,22%        | 0<br>0,05%        |
| X07 Intensively farmed crops interspersed with strips of natural and/or seminatural vegetation             | 4 188<br>99,32%              | 11<br>0,26%         | 12<br>0,29%      | 0<br>0%      | 1<br>0,02%        | 5<br>0,11%        |
| Total                                                                                                      | 1 676 713<br>55,23%          | 1 026 982<br>33,83% | 52 177<br>1,72%  | 280<br>0,01% | 142 950<br>4,71%  | 136 672<br>4,50%  |

| Classes EUNIS ptMAES, nível N                                            | Crop Production (t/ha) |            |                   |               |               |                  |            |
|--------------------------------------------------------------------------|------------------------|------------|-------------------|---------------|---------------|------------------|------------|
|                                                                          | 0                      | 0 - 0,5    | 0,5 - 1           | 1 - 2         | 2 - 5         | 5 - 10           | > 10       |
| B1 : Coastal dunes and sandy shores                                      | 2 715<br>100%          | 0<br>0%    | 0<br>0,00%        | 0<br>0,00%    | 0<br>0,00%    | 0<br>0,00%       | 0<br>0,00% |
| B1.6 : Coastal dune scrub                                                | 1 276<br>100%          | 0<br>0%    | 0<br>0,00%        | 0<br>0,00%    | 0<br>0,00%    | 0<br>0,00%       | 0<br>0,00% |
| B3 : Rock cliffs, ledges and shores, including the supralittoral         | 114<br>100%            | 0<br>0%    | 0<br>0,00%        | 0<br>0,00%    | 0<br>0,00%    | 0<br>0,00%       | 0<br>0,00% |
| E1 : Dry grasslands                                                      | 436 775<br>100%        | 0<br>0%    | 0<br>0,00%        | 0<br>0,00%    | 0<br>0,00%    | 0<br>0,00%       | 0<br>0,00% |
| E3 : Seasonally wet and wet grasslands                                   | 3 283<br>100%          | 0<br>0%    | 0<br>0,00%        | 0<br>0,00%    | 0<br>0,00%    | 0<br>0,00%       | 0<br>0,00% |
| E7.3 : Dehesa                                                            | 621 823<br>100%        | 0<br>0%    | 0<br>0,00%        | 0<br>0,00%    | 0<br>0,00%    | 0<br>0,00%       | 0<br>0,00% |
| F3.1 : Temperate thickets and scrub                                      | 1 352<br>100%          | 0<br>0%    | 0<br>0,00%        | 0<br>0,00%    | 0<br>0,00%    | 0<br>0,00%       | 0<br>0,00% |
| F4.2 : Dry heaths                                                        | 42 196<br>100%         | 0<br>0%    | 0<br>0,00%        | 0<br>0,00%    | 0<br>0,00%    | 0<br>0,00%       | 0<br>0,00% |
| F5 : Maquis, arborescent matorral and thermo-Mediterranean brushes       | 2 334<br>100%          | 0<br>0%    | 0<br>0,00%        | 0<br>0,00%    | 0<br>0,00%    | 0<br>0,00%       | 0<br>0,00% |
| F5.2 : Maquis                                                            | 36 386<br>100%         | 0<br>0%    | 0<br>0,00%        | 0<br>0,00%    | 0<br>0,00%    | 0<br>0,00%       | 0<br>0,00% |
| F5.5 : Thermo-Mediterranean scrub                                        | 22 585<br>100%         | 0<br>0%    | 0<br>0,00%        | 0<br>0,00%    | 0<br>0,00%    | 0<br>0,00%       | 0<br>0,00% |
| F6.1 : Western garrigues                                                 | 20 844<br>100%         | 0<br>0%    | 0<br>0,00%        | 0<br>0,00%    | 0<br>0,00%    | 0<br>0,00%       | 0<br>0,00% |
| FB.4 : Vineyards                                                         | 587<br>1,40%           | 0<br>0%    | 0<br>0,00%        | 0<br>0,00%    | 0<br>0,00%    | 41 266<br>98,60% | 0<br>0,00% |
| G1 : Broadleaved deciduous woodland                                      | 17 800<br>100%         | 0<br>0%    | 0<br>0,00%        | 0<br>0,00%    | 0<br>0,00%    | 0<br>0,00%       | 0<br>0,00% |
| G1.772 : Portuguese [ <i>Quercus faginea</i> ] forests                   | 519<br>100%            | 0<br>0%    | 0<br>0,00%        | 0<br>0,00%    | 0<br>0,00%    | 0<br>0,00%       | 0<br>0,00% |
| G1.7B : [ <i>Quercus pyrenaica</i> ] woodland                            | 3 443<br>100%          | 0<br>0%    | 0<br>0,00%        | 0<br>0,00%    | 0<br>0,00%    | 0<br>0,00%       | 0<br>0,00% |
| G1.7D : [ <i>Castanea sativa</i> ] woodland                              | 924<br>100%            | 0<br>0%    | 0<br>0,00%        | 0<br>0,00%    | 0<br>0,00%    | 0<br>0,00%       | 0<br>0,00% |
| G1.D1 : [ <i>Castanea sativa</i> ] plantations                           | 64<br>31,27%           | 0<br>0%    | 0<br>0,00%        | 140<br>68,73% | 0<br>0,00%    | 0<br>0,00%       | 0<br>0,00% |
| G1.D3 : [ <i>Prunus amygdalus</i> ] groves                               | 0<br>0%                | 39<br>100% | 0<br>0,00%        | 0<br>0,00%    | 0<br>0,00%    | 0<br>0,00%       | 0<br>0,00% |
| G1.D4 : Fruit orchards                                                   | 89<br>3,97%            | 0<br>0%    | 0<br>0,00%        | 0<br>0,00%    | 0<br>0,00%    | 2 165<br>96,03%  | 0<br>0,00% |
| G1.D5 : Other high-stem orchards                                         | 68<br>12,21%           | 0<br>0%    | 0<br>0,00%        | 0<br>0,00%    | 491<br>87,79% | 0<br>0,00%       | 0<br>0,00% |
| G2.1 : Mediterranean evergreen [ <i>Quercus</i> ] woodland               | 19<br>100%             | 0<br>0%    | 0<br>0,00%        | 0<br>0,00%    | 0<br>0,00%    | 0<br>0,00%       | 0<br>0,00% |
| G2.112 : Southwestern Iberian [ <i>Quercus suber</i> ] forests           | 244 970<br>100%        | 0<br>0%    | 0<br>0,00%        | 0<br>0,00%    | 0<br>0,00%    | 0<br>0,00%       | 0<br>0,00% |
| G2.124 : [ <i>Quercus rotundifolia</i> ] woodland                        | 141 809<br>100%        | 0<br>0%    | 0<br>0,00%        | 0<br>0,00%    | 0<br>0,00%    | 0<br>0,00%       | 0<br>0,00% |
| G2.81 : [ <i>Eucalyptus</i> ] plantations                                | 132 293<br>100%        | 0<br>0%    | 0<br>0,00%        | 0<br>0,00%    | 0<br>0,00%    | 0<br>0,00%       | 0<br>0,00% |
| G2.83 : Other evergreen broadleaved tree plantations                     | 268<br>100%            | 0<br>0%    | 0<br>0,00%        | 0<br>0,00%    | 0<br>0,00%    | 0<br>0,00%       | 0<br>0,00% |
| G2.91 : [ <i>Olea europaea</i> ] groves                                  | 673<br>0,41%           | 0<br>0%    | 164 530<br>99,59% | 0<br>0,00%    | 0<br>0,00%    | 0<br>0,00%       | 0<br>0,00% |
| G2.92 : Citrus orchards                                                  | 137<br>9,34%           | 0<br>0%    | 0<br>0,00%        | 0<br>0,00%    | 0<br>0,00%    | 1 329<br>90,66%  | 0<br>0,00% |
| G3.714 : Iberian [ <i>Pinus pinaster</i> ssp. <i>atlantica</i> ] forests | 22 809                 | 0          | 0                 | 0             | 0             | 0                | 0          |

| Classes EUNIS ptMAES, nível N                                                                          | Crop Production (t/ha) |               |                  |                   |              |                   |                    |
|--------------------------------------------------------------------------------------------------------|------------------------|---------------|------------------|-------------------|--------------|-------------------|--------------------|
|                                                                                                        | 0                      | 0 - 0,5       | 0,5 - 1          | 1 - 2             | 2 - 5        | 5 - 10            | > 10               |
|                                                                                                        | 100%                   | 0%            | 0,00%            | 0,00%             | 0,00%        | 0,00%             | 0,00%              |
| G3.7312 : Lusitanian stone pine forests                                                                | 26 181<br>100%         | 0<br>0%       | 0<br>0,00%       | 0<br>0,00%        | 0<br>0,00%   | 0<br>0,00%        | 0<br>0,00%         |
| G3.F2 : Exotic conifer plantations                                                                     | 3 994<br>100%          | 0<br>0%       | 0<br>0,00%       | 0<br>0,00%        | 0<br>0,00%   | 0<br>0,00%        | 0<br>0,00%         |
| G3.F22 : Exotic pine plantations                                                                       | 55 217<br>100%         | 0<br>0%       | 0<br>0,00%       | 0<br>0,00%        | 0<br>0,00%   | 0<br>0,00%        | 0<br>0,00%         |
| G4.B : Mixed mediterranean [Pinus] - thermophilous [Quercus] woodland                                  | 9 662<br>100%          | 0<br>0%       | 0<br>0,00%       | 0<br>0,00%        | 0<br>0,00%   | 0<br>0,00%        | 0<br>0,00%         |
| G4.F : Mixed forestry plantations                                                                      | 59 777<br>100%         | 0<br>0%       | 0<br>0,00%       | 0<br>0,00%        | 0<br>0,00%   | 0<br>0,00%        | 0<br>0,00%         |
| G5.7 : Coppice and early-stage plantations                                                             | 220 337<br>100%        | 0<br>0%       | 0<br>0,00%       | 0<br>0,00%        | 0<br>0,00%   | 0<br>0,00%        | 0<br>0,00%         |
| G5.8 : Recently felled areas                                                                           | 16 551<br>100%         | 0<br>0%       | 0<br>0,00%       | 0<br>0,00%        | 0<br>0,00%   | 0<br>0,00%        | 0<br>0,00%         |
| H3 : Inland cliffs, rock pavements and outcrops                                                        | 1 324<br>100%          | 0<br>0%       | 0<br>0,00%       | 0<br>0,00%        | 0<br>0,00%   | 0<br>0,00%        | 0<br>0,00%         |
| H5.3 : Sparsely- or un-vegetated habitats on mineral substrates not resulting from recent ice activity | 5 697<br>100%          | 0<br>0%       | 0<br>0,00%       | 0<br>0,00%        | 0<br>0,00%   | 0<br>0,00%        | 0<br>0,00%         |
| H5.5 : Burnt areas with very sparse or no vegetation                                                   | 2 100<br>100%          | 0<br>0%       | 0<br>0,00%       | 0<br>0,00%        | 0<br>0,00%   | 0<br>0,00%        | 0<br>0,00%         |
| H5.61 : Unsurfaced pathways                                                                            | 2 057<br>100%          | 0<br>0%       | 0<br>0,00%       | 0<br>0,00%        | 0<br>0,00%   | 0<br>0,00%        | 0<br>0,00%         |
| I1 : Arable land and market gardens                                                                    | 0<br>0%                | 0<br>0%       | 0<br>0,00%       | 0<br>0,00%        | 0<br>0,00%   | 0<br>0,00%        | 149 950<br>100,00% |
| I1.22 : Small-scale market gardens and horticulture, including allotments                              | 34 815<br>100%         | 0<br>0%       | 0<br>0,00%       | 0<br>0,00%        | 0<br>0,00%   | 0<br>0,00%        | 0<br>0,00%         |
| I1.3 : Arable land with unmixed crops grown by low-intensity agricultural methods                      | 9 910<br>2,18%         | 0<br>0%       | 0<br>0,00%       | 445 320<br>97,82% | 0<br>0,00%   | 0<br>0,00%        | 0<br>0,00%         |
| I1.4 : Inundated or inundatable croplands, including rice fields                                       | 0<br>0%                | 0<br>0%       | 0<br>0,00%       | 0<br>0,00%        | 0<br>0,00%   | 20 221<br>100,00% | 0<br>0,00%         |
| J2.43 : Greenhouses                                                                                    | 799<br>100%            | 0<br>0%       | 0<br>0,00%       | 0<br>0,00%        | 0<br>0,00%   | 0<br>0,00%        | 0<br>0,00%         |
| X07 : Intensively-farmed crops interspersed with strips of natural and/or semi-natural vegetation      | 4 217<br>100%          | 0<br>0%       | 0<br>0,00%       | 0<br>0,00%        | 0<br>0,00%   | 0<br>0,00%        | 0<br>0,00%         |
| Total                                                                                                  | 2 210 793<br>72,81%    | 39<br><0,005% | 164 530<br>5,42% | 445 460<br>14,67% | 491<br>0,02% | 64 982<br>2,14%   | 149 950<br>4,94%   |

| Classes EUNIS ptMAES, nível N                                  | Extensive Livestock Production (CN/ha) |                |                   |                   |                 |              |                |
|----------------------------------------------------------------|----------------------------------------|----------------|-------------------|-------------------|-----------------|--------------|----------------|
|                                                                | 0                                      | 0 a 0,2        | 0,2 a 0,4         | 0,4 a 0,6         | 0,6 a 0,8       | 0,8 a 1,0    | > 1,0          |
| B1 Coastal dunes and sandy shores                              | 2 715<br>100%                          | 0<br>0%        | 0<br>0%           | 0<br>0,00%        | 0<br>0,00%      | 0<br>0,00%   | 0<br>0,00%     |
| B1.6 Coastal dune scrub                                        | 1 276<br>100%                          | 0<br>0%        | 0<br>0%           | 0<br>0,00%        | 0<br>0,00%      | 0<br>0,00%   | 0<br>0,00%     |
| B3 Rock cliffs, ledges and shores, including the supralittoral | 114<br>100%                            | 0<br>0%        | 0<br>0%           | 0<br>0,00%        | 0<br>0,00%      | 0<br>0,00%   | 0<br>0,00%     |
| E1 Dry grasslands                                              | 69 301<br>15,87%                       | 5 115<br>1,17% | 127 046<br>29,09% | 217 367<br>49,77% | 10 053<br>2,30% | 848<br>0,19% | 7 046<br>1,61% |
| E3 Seasonally wet and wet grasslands                           | 3 283<br>100%                          | 0<br>0%        | 0<br>0%           | 0<br>0,00%        | 0<br>0,00%      | 0<br>0,00%   | 0<br>0,00%     |
| E7.3 Dehesa                                                    | 66 144<br>10,64%                       | 8 183<br>1,32% | 253 727<br>40,80% | 282 193<br>45,38% | 7 962<br>1,28%  | 560<br>0,09% | 3 054<br>0,49% |
| F3.1 Temperate thickets and scrub                              | 1 352<br>100%                          | 0<br>0%        | 0<br>0%           | 0<br>0,00%        | 0<br>0,00%      | 0<br>0,00%   | 0<br>0,00%     |
| F4.2 Dry heaths                                                | 42 196<br>100%                         | 0<br>0%        | 0<br>0%           | 0<br>0,00%        | 0<br>0,00%      | 0<br>0,00%   | 0<br>0,00%     |
|                                                                | 2 334                                  | 0              | 0                 | 0                 | 0               | 0            | 0              |

| Classes EUNIS ptMAES, nível N                                                         | Extensive Livestock Production (CN/ha) |         |           |            |            |            |            |
|---------------------------------------------------------------------------------------|----------------------------------------|---------|-----------|------------|------------|------------|------------|
|                                                                                       | 0                                      | 0 a 0,2 | 0,2 a 0,4 | 0,4 a 0,6  | 0,6 a 0,8  | 0,8 a 1,0  | > 1,0      |
| F5 Maquis, arborescent matorral and thermo-Mediterranean brushes                      | 100%                                   | 0%      | 0%        | 0,00%      | 0,00%      | 0,00%      | 0,00%      |
| F5.2 Maquis                                                                           | 36 386<br>100%                         | 0<br>0% | 0<br>0%   | 0<br>0,00% | 0<br>0,00% | 0<br>0,00% | 0<br>0,00% |
| F5.5 Thermo-Mediterranean scrub                                                       | 22 585<br>100%                         | 0<br>0% | 0<br>0%   | 0<br>0,00% | 0<br>0,00% | 0<br>0,00% | 0<br>0,00% |
| F6.1 Western garrigues                                                                | 20 844<br>100%                         | 0<br>0% | 0<br>0%   | 0<br>0,00% | 0<br>0,00% | 0<br>0,00% | 0<br>0,00% |
| FB.4 Vineyards                                                                        | 41 853<br>100%                         | 0<br>0% | 0<br>0%   | 0<br>0,00% | 0<br>0,00% | 0<br>0,00% | 0<br>0,00% |
| G1 Broadleaved deciduous woodland                                                     | 17 800<br>100%                         | 0<br>0% | 0<br>0%   | 0<br>0,00% | 0<br>0,00% | 0<br>0,00% | 0<br>0,00% |
| G1.772 Portuguese [ <i>Quercus faginea</i> ] forests                                  | 519<br>100%                            | 0<br>0% | 0<br>0%   | 0<br>0,00% | 0<br>0,00% | 0<br>0,00% | 0<br>0,00% |
| G1.7B [ <i>Quercus pyrenaica</i> ] woodland                                           | 3 443<br>100%                          | 0<br>0% | 0<br>0%   | 0<br>0,00% | 0<br>0,00% | 0<br>0,00% | 0<br>0,00% |
| G1.7D [ <i>Castanea sativa</i> ] woodland                                             | 924<br>100%                            | 0<br>0% | 0<br>0%   | 0<br>0,00% | 0<br>0,00% | 0<br>0,00% | 0<br>0,00% |
| G1.D1 [ <i>Castanea sativa</i> ] plantations                                          | 203<br>100%                            | 0<br>0% | 0<br>0%   | 0<br>0,00% | 0<br>0,00% | 0<br>0,00% | 0<br>0,00% |
| G1.D3 [ <i>Prunus amygdalus</i> ] groves                                              | 39<br>100%                             | 0<br>0% | 0<br>0%   | 0<br>0,00% | 0<br>0,00% | 0<br>0,00% | 0<br>0,00% |
| G1.D4 Fruit orchards                                                                  | 2 255<br>100%                          | 0<br>0% | 0<br>0%   | 0<br>0,00% | 0<br>0,00% | 0<br>0,00% | 0<br>0,00% |
| G1.D5 Other high-stem orchards                                                        | 559<br>100%                            | 0<br>0% | 0<br>0%   | 0<br>0,00% | 0<br>0,00% | 0<br>0,00% | 0<br>0,00% |
| G2.1 Mediterranean evergreen [ <i>Quercus</i> ] woodland                              | 19<br>100%                             | 0<br>0% | 0<br>0%   | 0<br>0,00% | 0<br>0,00% | 0<br>0,00% | 0<br>0,00% |
| G2.112 Southwestern Iberian [ <i>Quercus suber</i> ] forests                          | 244 970<br>100%                        | 0<br>0% | 0<br>0%   | 0<br>0,00% | 0<br>0,00% | 0<br>0,00% | 0<br>0,00% |
| G2.124 [ <i>Quercus rotundifolia</i> ] woodland                                       | 141 809<br>100%                        | 0<br>0% | 0<br>0%   | 0<br>0,00% | 0<br>0,00% | 0<br>0,00% | 0<br>0,00% |
| G2.81 [ <i>Eucalyptus</i> ] plantations                                               | 132 293<br>100%                        | 0<br>0% | 0<br>0%   | 0<br>0,00% | 0<br>0,00% | 0<br>0,00% | 0<br>0,00% |
| G2.83 Other evergreen broadleaved tree plantations                                    | 268<br>100%                            | 0<br>0% | 0<br>0%   | 0<br>0,00% | 0<br>0,00% | 0<br>0,00% | 0<br>0,00% |
| G2.91 [ <i>Olea europaea</i> ] groves                                                 | 165 203<br>100%                        | 0<br>0% | 0<br>0%   | 0<br>0,00% | 0<br>0,00% | 0<br>0,00% | 0<br>0,00% |
| G2.92 Citrus orchards                                                                 | 1 465<br>100%                          | 0<br>0% | 0<br>0%   | 0<br>0,00% | 0<br>0,00% | 0<br>0,00% | 0<br>0,00% |
| G3.714 Iberian [ <i>Pinus pinaster</i> ssp. <i>atlantica</i> ] forests                | 22 809<br>100%                         | 0<br>0% | 0<br>0%   | 0<br>0,00% | 0<br>0,00% | 0<br>0,00% | 0<br>0,00% |
| G3.7312 Lusitanian stone pine forests                                                 | 26 181<br>100%                         | 0<br>0% | 0<br>0%   | 0<br>0,00% | 0<br>0,00% | 0<br>0,00% | 0<br>0,00% |
| G3.F2 Exotic conifer plantations                                                      | 3 994<br>100%                          | 0<br>0% | 0<br>0%   | 0<br>0,00% | 0<br>0,00% | 0<br>0,00% | 0<br>0,00% |
| G3.F22 Exotic pine plantations                                                        | 55 217<br>100%                         | 0<br>0% | 0<br>0%   | 0<br>0,00% | 0<br>0,00% | 0<br>0,00% | 0<br>0,00% |
| G4.B Mixed Mediterranean [ <i>Pinus</i> ] - thermophilous [ <i>Quercus</i> ] woodland | 9 662<br>100%                          | 0<br>0% | 0<br>0%   | 0<br>0,00% | 0<br>0,00% | 0<br>0,00% | 0<br>0,00% |
| G4.F Mixed forestry plantations                                                       | 59 777<br>100%                         | 0<br>0% | 0<br>0%   | 0<br>0,00% | 0<br>0,00% | 0<br>0,00% | 0<br>0,00% |
| G5.7 Coppice and early-stage plantations                                              | 220 337<br>100%                        | 0<br>0% | 0<br>0%   | 0<br>0,00% | 0<br>0,00% | 0<br>0,00% | 0<br>0,00% |
| G5.8 Recently felled areas                                                            | 16 551<br>100%                         | 0<br>0% | 0<br>0%   | 0<br>0,00% | 0<br>0,00% | 0<br>0,00% | 0<br>0,00% |
| H3 Inland cliffs, rock pavements and outcrops                                         | 1 324                                  | 0       | 0         | 0          | 0          | 0          | 0          |

| Classes EUNIS ptMAES, nível N                                                                        | Extensive Livestock Production (CN/ha) |                 |                   |                   |                 |                |                 |
|------------------------------------------------------------------------------------------------------|----------------------------------------|-----------------|-------------------|-------------------|-----------------|----------------|-----------------|
|                                                                                                      | 0                                      | 0 a 0,2         | 0,2 a 0,4         | 0,4 a 0,6         | 0,6 a 0,8       | 0,8 a 1,0      | > 1,0           |
|                                                                                                      | 100%                                   | 0%              | 0%                | 0,00%             | 0,00%           | 0,00%          | 0,00%           |
| H5.3 Sparsely- or un-vegetated habitats on mineral substrates not resulting from recent ice activity | 5 697<br>100%                          | 0<br>0%         | 0<br>0%           | 0<br>0,00%        | 0<br>0,00%      | 0<br>0,00%     | 0<br>0,00%      |
| H5.5 Burnt areas with very sparse or no vegetation                                                   | 2 100<br>100%                          | 0<br>0%         | 0<br>0%           | 0<br>0,00%        | 0<br>0,00%      | 0<br>0,00%     | 0<br>0,00%      |
| H5.61 Unsurfaced pathways                                                                            | 2 057<br>100%                          | 0<br>0%         | 0<br>0%           | 0<br>0,00%        | 0<br>0,00%      | 0<br>0,00%     | 0<br>0,00%      |
| I1 Arable land and market gardens                                                                    | 149 950<br>100%                        | 0<br>0%         | 0<br>0%           | 0<br>0,00%        | 0<br>0,00%      | 0<br>0,00%     | 0<br>0,00%      |
| I1.22 Small-scale market gardens and horticulture, including allotments                              | 34 815<br>100%                         | 0<br>0%         | 0<br>0%           | 0<br>0,00%        | 0<br>0,00%      | 0<br>0,00%     | 0<br>0,00%      |
| I1.3 Arable land with unmixed crops grown by low-intensity agricultural methods                      | 455 231<br>100%                        | 0<br>0%         | 0<br>0%           | 0<br>0,00%        | 0<br>0,00%      | 0<br>0,00%     | 0<br>0,00%      |
| I1.4 Inundated or inundatable croplands, including rice fields                                       | 20 221<br>100%                         | 0<br>0%         | 0<br>0%           | 0<br>0,00%        | 0<br>0,00%      | 0<br>0,00%     | 0<br>0,00%      |
| J2.43 Greenhouses                                                                                    | 799<br>100%                            | 0<br>0%         | 0<br>0%           | 0<br>0,00%        | 0<br>0,00%      | 0<br>0,00%     | 0<br>0,00%      |
| X07 Intensively-farmed crops interspersed with strips of natural and/or semi-natural vegetation      | 4 217<br>100%                          | 0<br>0%         | 0<br>0%           | 0<br>0,00%        | 0<br>0,00%      | 0<br>0,00%     | 0<br>0,00%      |
| Total                                                                                                | 2 113 091<br>69,60%                    | 13 298<br>0,44% | 380 773<br>12,54% | 499 561<br>16,45% | 18 015<br>0,59% | 1 407<br>0,05% | 10 100<br>0,33% |

## S7 SPATIAL OVERLAP REGULATING ES

### a. Carbon Sequestration

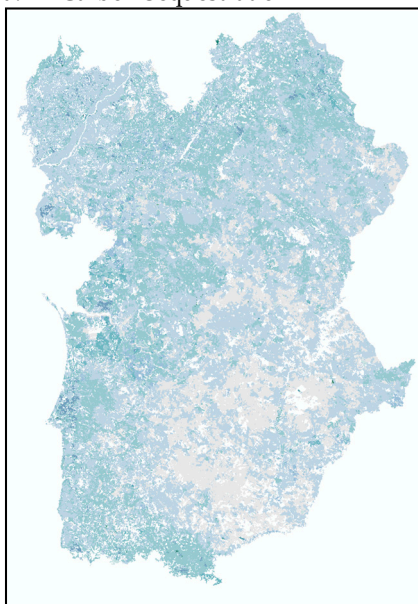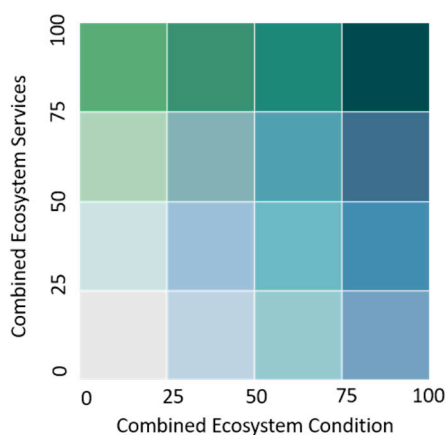

### b. Control of Erosion Rates

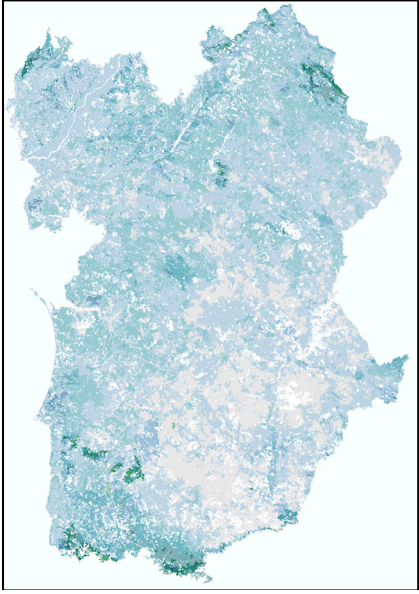

## S8 BIRD DIVERSITY MODELS

|                               | b <sub>0</sub> | Precipitation, Temperature, Altitude |           |           |           | Land-use variables |         |          |          |          |          |          |          |         |           |  |
|-------------------------------|----------------|--------------------------------------|-----------|-----------|-----------|--------------------|---------|----------|----------|----------|----------|----------|----------|---------|-----------|--|
| Species                       |                | rain                                 | tmin      | tmax      | Altm      | purb               | plot    | plen     | flor     | floa     | agrs     | agrr     | agrp     | agrm    | mont      |  |
| <i>Saxicola torquatus</i>     | -3.46 ***      | 0.007 ***                            |           |           |           |                    |         |          |          |          |          | 0.35 "   |          |         |           |  |
| <i>Sylvia melanocephala</i>   | 29.8 ***       | 0                                    | -0.87 *** | -0.99 *** | -0.01 **  |                    |         |          | 0.90 *** |          | -0.56 *  | 0.43 "   |          | 0.33    |           |  |
| <i>Turdus merula</i>          | 25.7 **        | 0.01 *                               | -0.64 *   | -0.93 *** | -0.01 *   | -0.42 "            |         |          | 0.62 *   | 0.33     |          |          | 0.35     |         | 0.61 *    |  |
| <i>Parus caeruleus</i>        | 12.0 "         | 0.007 **                             | -0.38 **  | -0.55 **  |           |                    |         |          | 1.21 *** |          |          | -0.61 ** |          |         | 0.81 **   |  |
| <i>Parus major</i>            | -4.73 ***      | 0.007 **                             |           |           | 0.003 *   |                    |         |          | 1.07 *** |          | -0.38    | -0.58 *  |          |         | 0.60 *    |  |
| <i>Emberiza calandra</i>      | -2.8 ***       |                                      |           |           | 0.003 **  |                    |         | 0.37 "   | 0.38     |          | 0.47 "   |          |          |         |           |  |
| <i>Lanius meridionalis</i>    | -0.1           |                                      | -0.49 *   |           | -0.01 "   |                    |         |          |          |          |          |          |          | 0.51 ** | -0.46 "   |  |
| <i>Frigilla coelebs</i>       | -2.05 **       |                                      | -0.37 **  |           |           | -0.43 *            | -0.70 * |          | 1.17 *** |          | -0.58 *  |          |          |         |           |  |
| <i>Buteo buteo</i>            | -2.77 **       | 0.004 *                              |           |           |           | 0.34 "             | -0.8 *  |          |          |          | -0.53 *  | 0.51 *   |          |         |           |  |
| <i>Carduelis carduelis</i>    | -2.51 **       | 0.004 "                              |           |           |           | -0.3               |         |          | 0.65 *   |          | 0.47 "   |          |          |         | -0.39     |  |
| <i>Passer domesticus</i>      | -3.74 ***      | 0.004 "                              |           |           |           | 0.53 *             |         |          | 0.66 *   |          | 0.63 *   | 0.79 *** | -0.47 "  |         |           |  |
| <i>Erithacus rubecula</i>     | -7.05 ***      |                                      | 0.34 "    |           | 0.01 ***  | -0.32              |         | -0.62 ** | 0.80 *   |          |          |          |          |         |           |  |
| <i>Bubulcus ibis</i>          | -1.32          | 0.004*                               | -0.56 *   |           | -0.01 *** |                    |         | 0.44 *   |          | -0.52 *  |          | 0.49 *   |          | 0.36    |           |  |
| <i>Galerida cristata</i>      | 0.6            |                                      | -0.61 *   |           | -0.01 *   |                    |         |          |          | -0.68 ** |          | 0.50 *   |          |         |           |  |
| <i>Lullula arborea</i>        | -6.68 ***      | 0.01 **                              |           |           | 0.004 *** |                    |         |          | 0.76 *   |          |          | -0.52 *  |          |         | 1.02 **   |  |
| <i>Carduelis cannabina</i>    | -1.54 *        |                                      | -0.40 **  |           |           | -0.39 "            |         | -0.37 "  | 0.73 **  |          |          |          |          |         | -0.48 "   |  |
| <i>Galerida theklae</i>       | 2.08 "         | -0.01 ***                            | -0.56 *   |           | 0.004 *   | -0.84 ***          |         |          | 0.76 *   |          |          |          |          |         |           |  |
| <i>Corvus corone</i>          | 26.8 **        | 0.02 ***                             |           | -1.13 *** | -0.01 *** |                    |         |          |          |          |          |          |          |         |           |  |
| <i>Phylloscopus collybita</i> | -3.99 ***      | 0.01 **                              |           |           |           |                    |         | -0.33    | 0.59 *   |          |          |          |          |         |           |  |
| <i>Serinus serinus</i>        | 6.21           | 0.01 ***                             |           | -0.39 *   |           |                    |         | -0.44 "  | 0.61 "   |          |          |          | 0.49 "   |         |           |  |
| <i>Oenanthe oenanthe</i>      | 1.09           |                                      | -0.79 **  |           | -0.01 **  |                    |         |          | -0.70 ** | -0.37    | 0.98 **  |          | -0.44 "  |         |           |  |
| <i>Cisticola juncidis</i>     | -1.3 **        |                                      | 0.31 *    |           |           |                    |         |          | 0.54     | -0.76 ** | 0.92 *** |          | 0.40 *** |         | -0.78 **  |  |
| <i>Garrulus glandarius</i>    | -7.95 ***      | 0.01 ***                             | -0.51 **  |           |           | -0.42 "            |         |          | 1.03 *   | 0.7 **   |          |          |          | 0.57 *  | 0.83 *    |  |
| <i>Motacilla alba</i>         | -3.53 ***      | 0.01 *                               |           |           | -0.01 **  |                    |         | 0.36     | 0.50     |          |          |          | 0.42     |         |           |  |
| <i>Falco tinnunculus</i>      | 25.7 **        | -0.01 "                              | -1.33 *** | -0.66 *   | -0.01 *** | -0.43 "            |         |          | -0.63 *  |          |          |          |          |         | -0.99 *** |  |
| <i>Upupa epops</i>            | 29.8 ***       | -0.01 **                             | -0.86 **  | -0.87 *** | -0.01 **  | -0.36              | -0.7 "  | 0.83 *** |          |          |          |          |          |         |           |  |
| <i>Cyanopica cyanus</i>       | -0.63          | -0.01 *                              | -0.3 "    |           |           |                    |         |          | 0.49 "   |          |          |          | -0.4     |         | 0.56      |  |
| <i>Carduelis chloris</i>      | -4.9 ***       | 0.01 **                              |           |           | -0.01 *   |                    |         | -0.4 "   | 0.86 *   |          |          |          |          |         | -0.61 *   |  |
| <i>Columba palumbus</i>       | -5.12 ***      | 0.01 *                               |           |           |           |                    |         |          |          |          |          |          |          | -0.38   |           |  |
| <i>Sylvia altricapilla</i>    | -5.6 ***       | 0.003                                | 0.44 "    |           | 0.004 *   |                    |         | -0.79 ** | 1.81 *** |          |          |          | 0.71 *   |         | -0.51     |  |
| <i>Egretta garzetta</i>       | -4.95 ***      | 0.008 ***                            | -0.41     |           | -0.01 **  |                    | 0.93 ** | 1.45 *** |          | 0.68 *   |          | 0.53 *   |          | -0.52 " | 0.71 "    |  |
| <i>Sitta europaea</i>         | -12.2 ***      | 0.02 ***                             | 0.42      |           | 0.007 *** |                    | -0.92 * |          | 1.06 *   |          | -0.98 ** | 0.48     | -0.92 ** |         | 1.83 ***  |  |



|                               | <i>b</i> <sub>0</sub> | <i>Precipitation, Temperature, Altitude</i> |             |             |             | <i>Land-use variables</i> |             |             |             |             |             |             |             |             |             |  |
|-------------------------------|-----------------------|---------------------------------------------|-------------|-------------|-------------|---------------------------|-------------|-------------|-------------|-------------|-------------|-------------|-------------|-------------|-------------|--|
| <i>Species</i>                |                       | <i>rain</i>                                 | <i>tmin</i> | <i>tmax</i> | <i>Altm</i> | <i>purb</i>               | <i>plot</i> | <i>plen</i> | <i>flor</i> |  |
| <i>Certhia brachydactylum</i> | -10.9 ***             | 0.01 ***                                    | 0.52 *      |             | 0.006 **    |                           |             |             | 1.34 **     |             |             |             |             |             | 1.16 **     |  |
| <i>Anthus pratensis</i>       | -1.78 ***             |                                             |             |             |             |                           | -0.92 *     |             | 0.70 *      |             |             | 0.48 *      |             | -0.44 "     |             |  |
| <i>Cettia cetti</i>           | 37.42 ***             |                                             | -0.70 *     | -1.29 ***   | -0.01 ***   |                           | 1.15 ***    |             | 0.88 *      |             |             | 0.80 **     |             |             | 0.83 "      |  |
| <i>Elanus caeruleus</i>       | -0.36                 | -0.01                                       |             |             |             |                           |             |             |             | -0.37 "     |             | 0.83 **     | 0.48        | -0.55 "     |             |  |
| <i>Ficedula hypoleuca</i>     | -4.08 ***             | 0.004                                       | -0.34 *     |             |             |                           |             |             | 0.92 *      | 0.50 "      |             |             |             |             |             |  |
| <i>Hirundo rustica</i>        | 10.6                  |                                             |             | -0.51 *     | -0.01 "     |                           |             | 0.51 "      | 1.07 *      |             |             | 0.46        | -0.44       |             |             |  |
| <i>Ardea cinerea</i>          | -2.08 ***             |                                             |             |             | -0.01 **    | -0.41                     | 0.89 *      | 1.22 ***    | 0.51        |             |             | 0.89 **     |             |             |             |  |
| <i>Hirundo daurica</i>        | -1.59 ***             |                                             | -0.29 "     |             |             |                           | 1.41 ***    |             |             |             | -0.56 "     |             |             | 0.418       |             |  |

*p* value: \*\*\* 0, \*\* 0,001, \* 0,01, " 0,1; no symbol = not significant
